# Supplementary material for: Facile one-pot reduction of β-nitrostyrenes to phenethylamines using sodium borohydride and copper(II) chloride
Source: publisher site journal article supplement (doi:10.3762/bjoc.21.4), 2025-01-07
Supplement: Additional file 1 [file 1860-5397-21-4-S1.pdf]

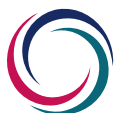

## Supporting Information

for

### **Facile one-pot reduction of $\beta$ -nitrostyrenes to phenethylamines using sodium borohydride and copper(II) chloride**

Laura D'Andrea and Simon Jademyr

*Beilstein J. Org. Chem.* **2025**, *21*, 39–46. doi:10.3762/bjoc.21.4

**$^1\text{H}$  and  $^{13}\text{C}$  NMR spectra of the synthesized compounds, the optimization table, and ESI-MS spectra for the synthesis of 4b**

# Table of Contents

|                                                                                          |               |
|------------------------------------------------------------------------------------------|---------------|
| <b>2-Phenylethan-1-amine hydrochloride (1b)</b> .....                                    | <b>S1</b>     |
| <sup>1</sup> H NMR spectrum .....                                                        | S1            |
| <sup>13</sup> C NMR spectrum .....                                                       | S2            |
| <b>2-(4-Methoxyphenyl)ethan-1-amine hydrochloride (2b)</b> .....                         | <b>S3</b>     |
| <sup>1</sup> H NMR spectrum .....                                                        | S3            |
| <sup>13</sup> C NMR spectrum .....                                                       | S4            |
| <b>1-(2,5-Dimethoxyphenyl)propan-2-amine hydrochloride (3b)</b> .....                    | <b>S5</b>     |
| <sup>1</sup> H NMR spectrum .....                                                        | S5            |
| <sup>13</sup> C NMR spectrum .....                                                       | S6            |
| <b>2-(2,5-Dimethoxyphenyl)ethan-1-amine hydrochloride (4b)</b> .....                     | <b>S7</b>     |
| <sup>1</sup> H NMR spectrum .....                                                        | S7            |
| <sup>13</sup> C NMR spectrum .....                                                       | S8            |
| <b>2-(2,5-Dimethoxy-4-methylphenyl)ethan-1-amine hydrochloride (5b)</b> .....            | <b>S9</b>     |
| <sup>1</sup> H NMR spectrum .....                                                        | S9            |
| <sup>13</sup> C NMR spectrum .....                                                       | S10           |
| <b>2-(2,5-Dimethoxy-4-(trifluoromethyl)phenyl)ethan-1-amine hydrochloride (6b)</b> ..... | <b>S11</b>    |
| <sup>1</sup> H NMR spectrum .....                                                        | S11           |
| <sup>13</sup> C NMR spectrum .....                                                       | S12           |
| <b>Aniline hydrochloride (7b)</b> .....                                                  | <b>S13</b>    |
| <sup>1</sup> H NMR spectrum .....                                                        | S13           |
| <sup>13</sup> C NMR spectrum .....                                                       | S14           |
| <b><i>p</i>-Bromoaniline hydrochloride (8b)</b> .....                                    | <b>S15</b>    |
| <sup>1</sup> H NMR spectrum .....                                                        | S15           |
| <sup>13</sup> C NMR spectrum .....                                                       | S16           |
| <b>Benzyl alcohol (9b)</b> .....                                                         | <b>S17</b>    |
| <sup>1</sup> H NMR spectrum .....                                                        | S17           |
| <sup>13</sup> C NMR spectrum .....                                                       | S18           |
| <b>Optimization table</b> .....                                                          | <b>S19</b>    |
| <b>ESI/MS spectra of 4b</b> .....                                                        | <b>S20-22</b> |
| <b>References</b> .....                                                                  | <b>S23</b>    |

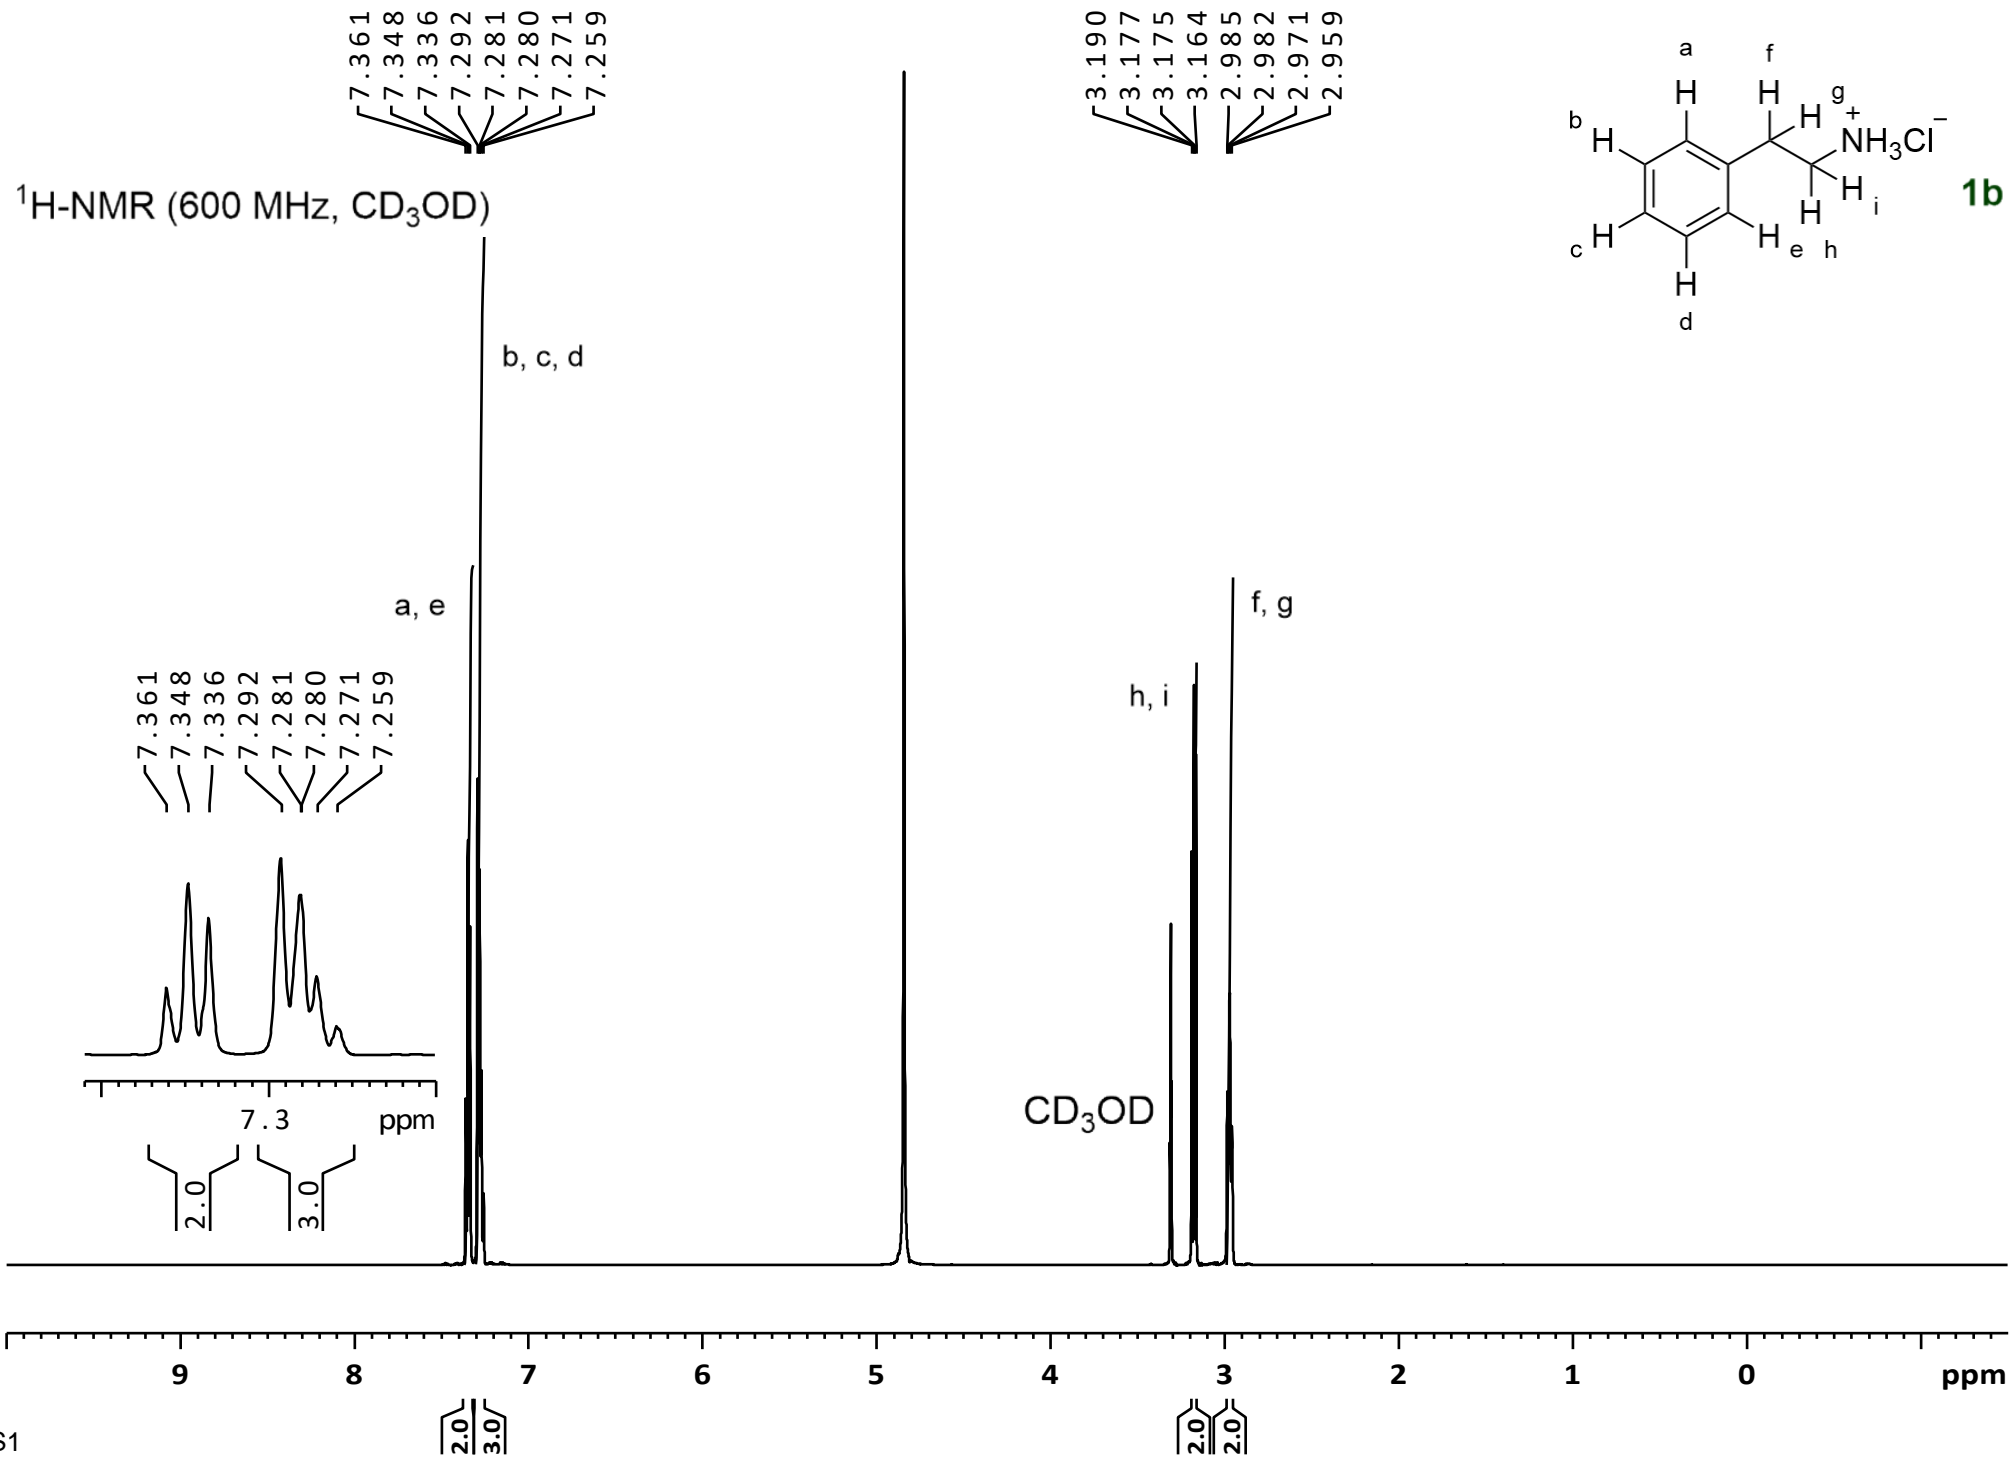

$^{13}\text{C}$ -NMR (151 MHz,  $\text{CD}_3\text{OD}$ )

137.92  
129.99  
129.77  
128.26

41.98  
34.55

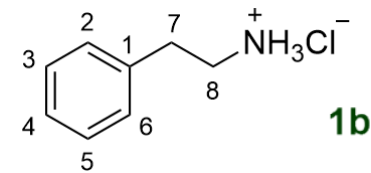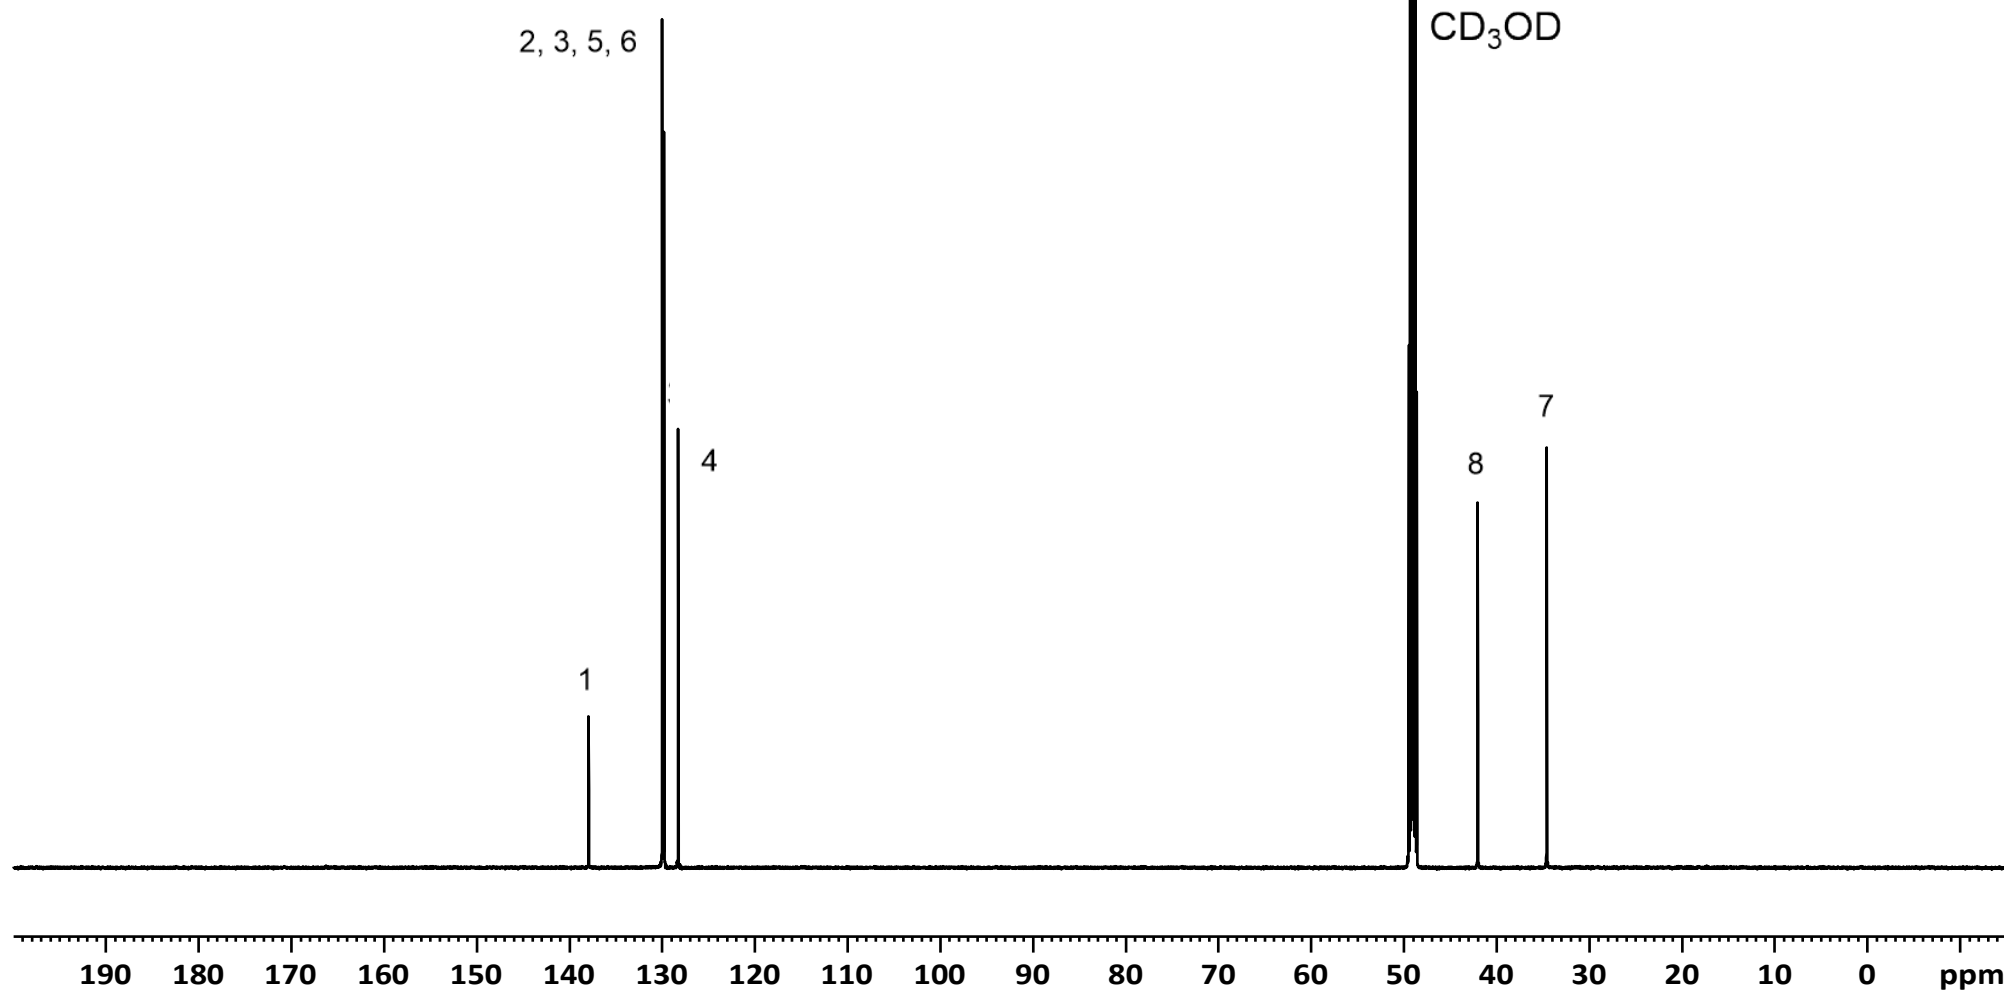

<sup>1</sup>H-NMR (600 MHz, CD<sub>3</sub>OD)

7.198  
7.193  
7.190  
7.182  
7.179  
7.174  
6.919  
6.914  
6.911  
6.903  
6.900  
6.895

3.778  
3.141  
3.129  
3.115  
2.899  
2.885  
2.873

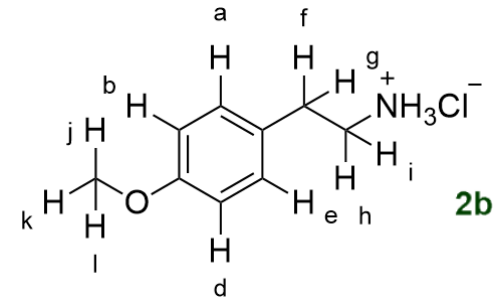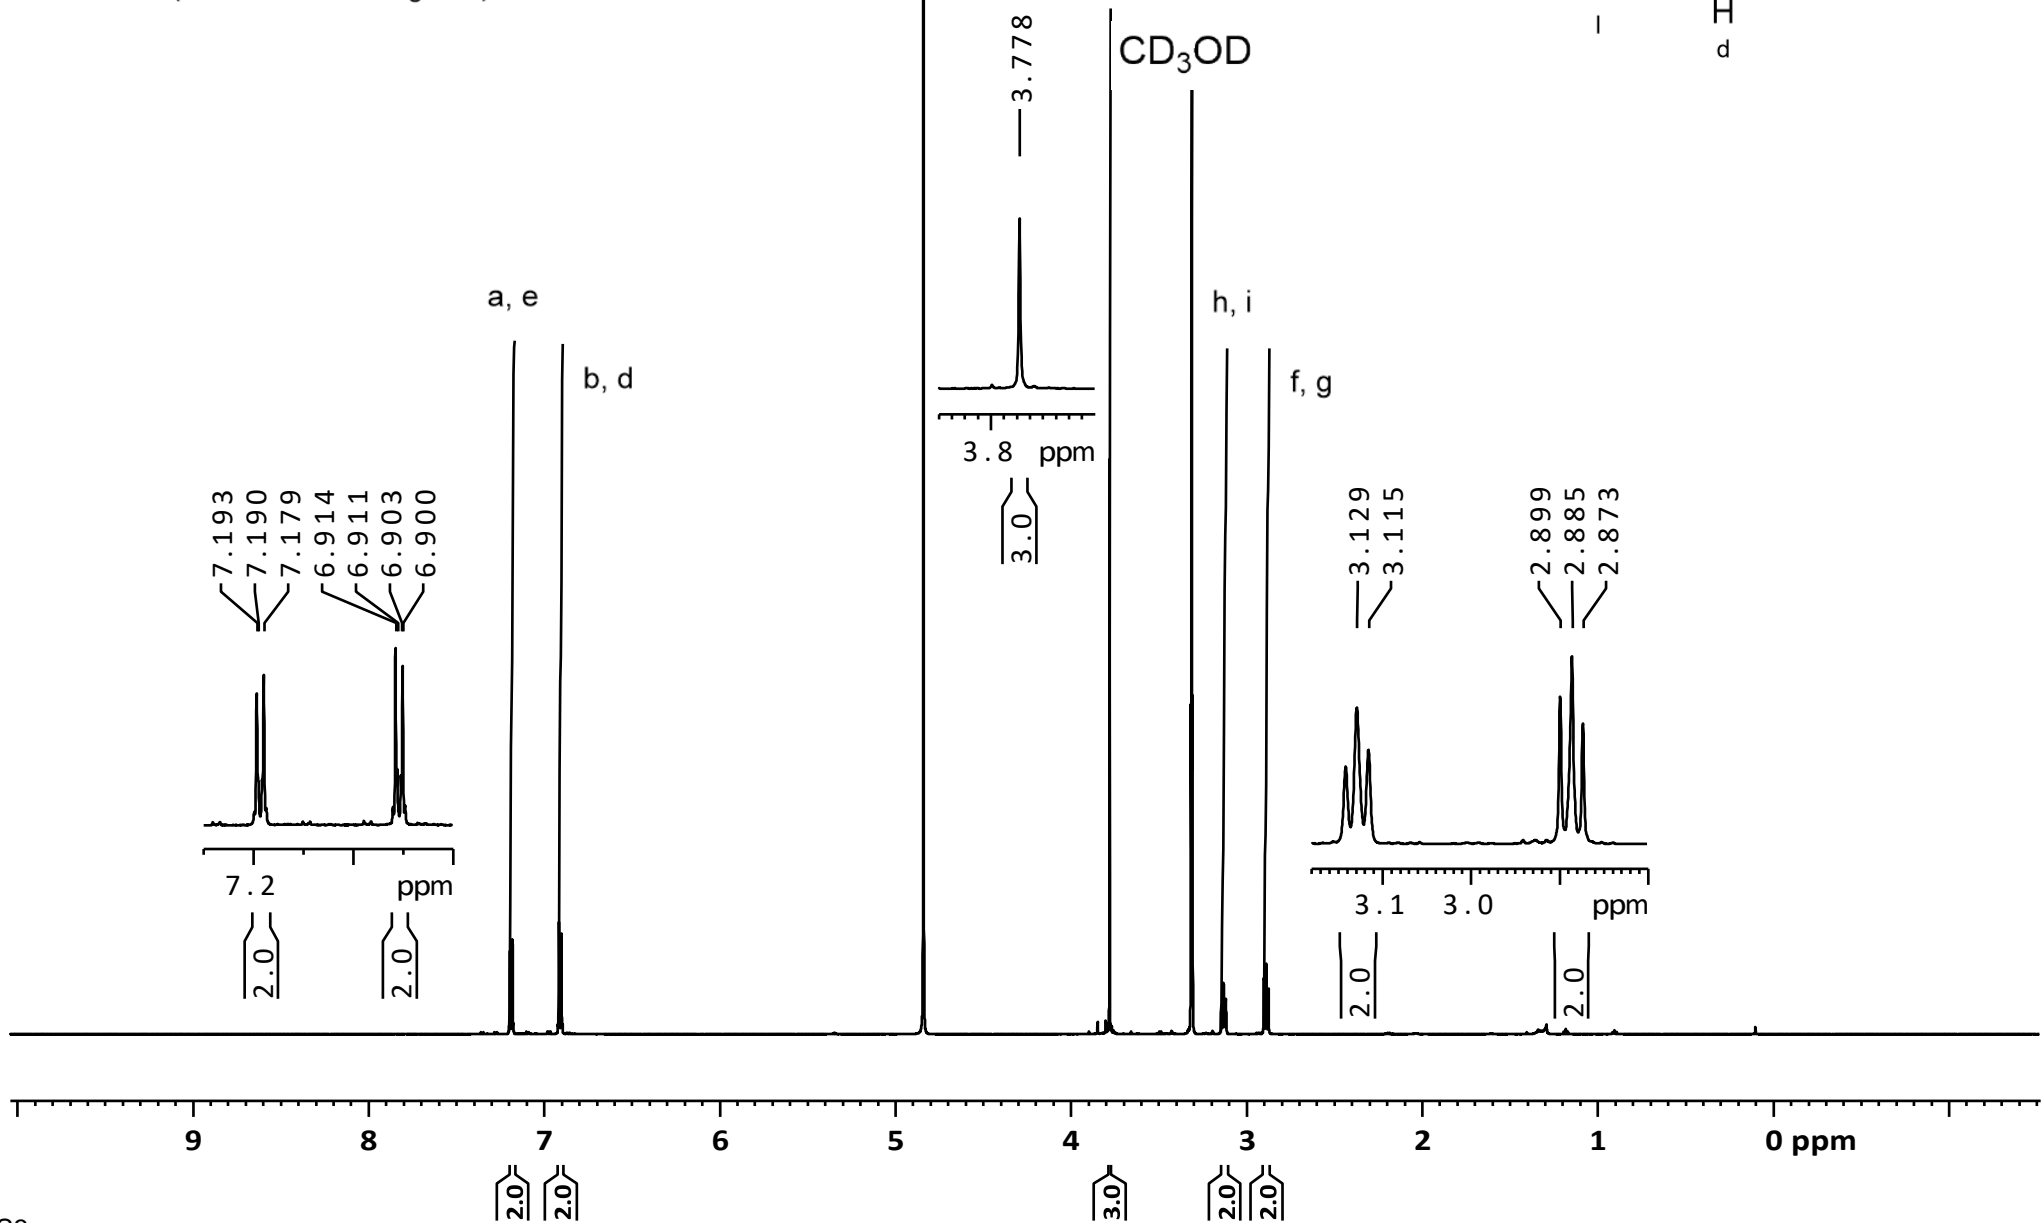

$^{13}\text{C}$ -NMR (151 MHz,  $\text{CD}_3\text{OD}$ )

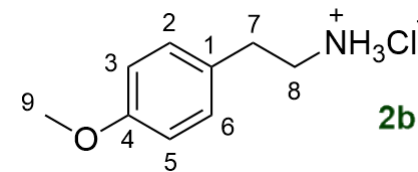

$\text{CD}_3\text{OD}$

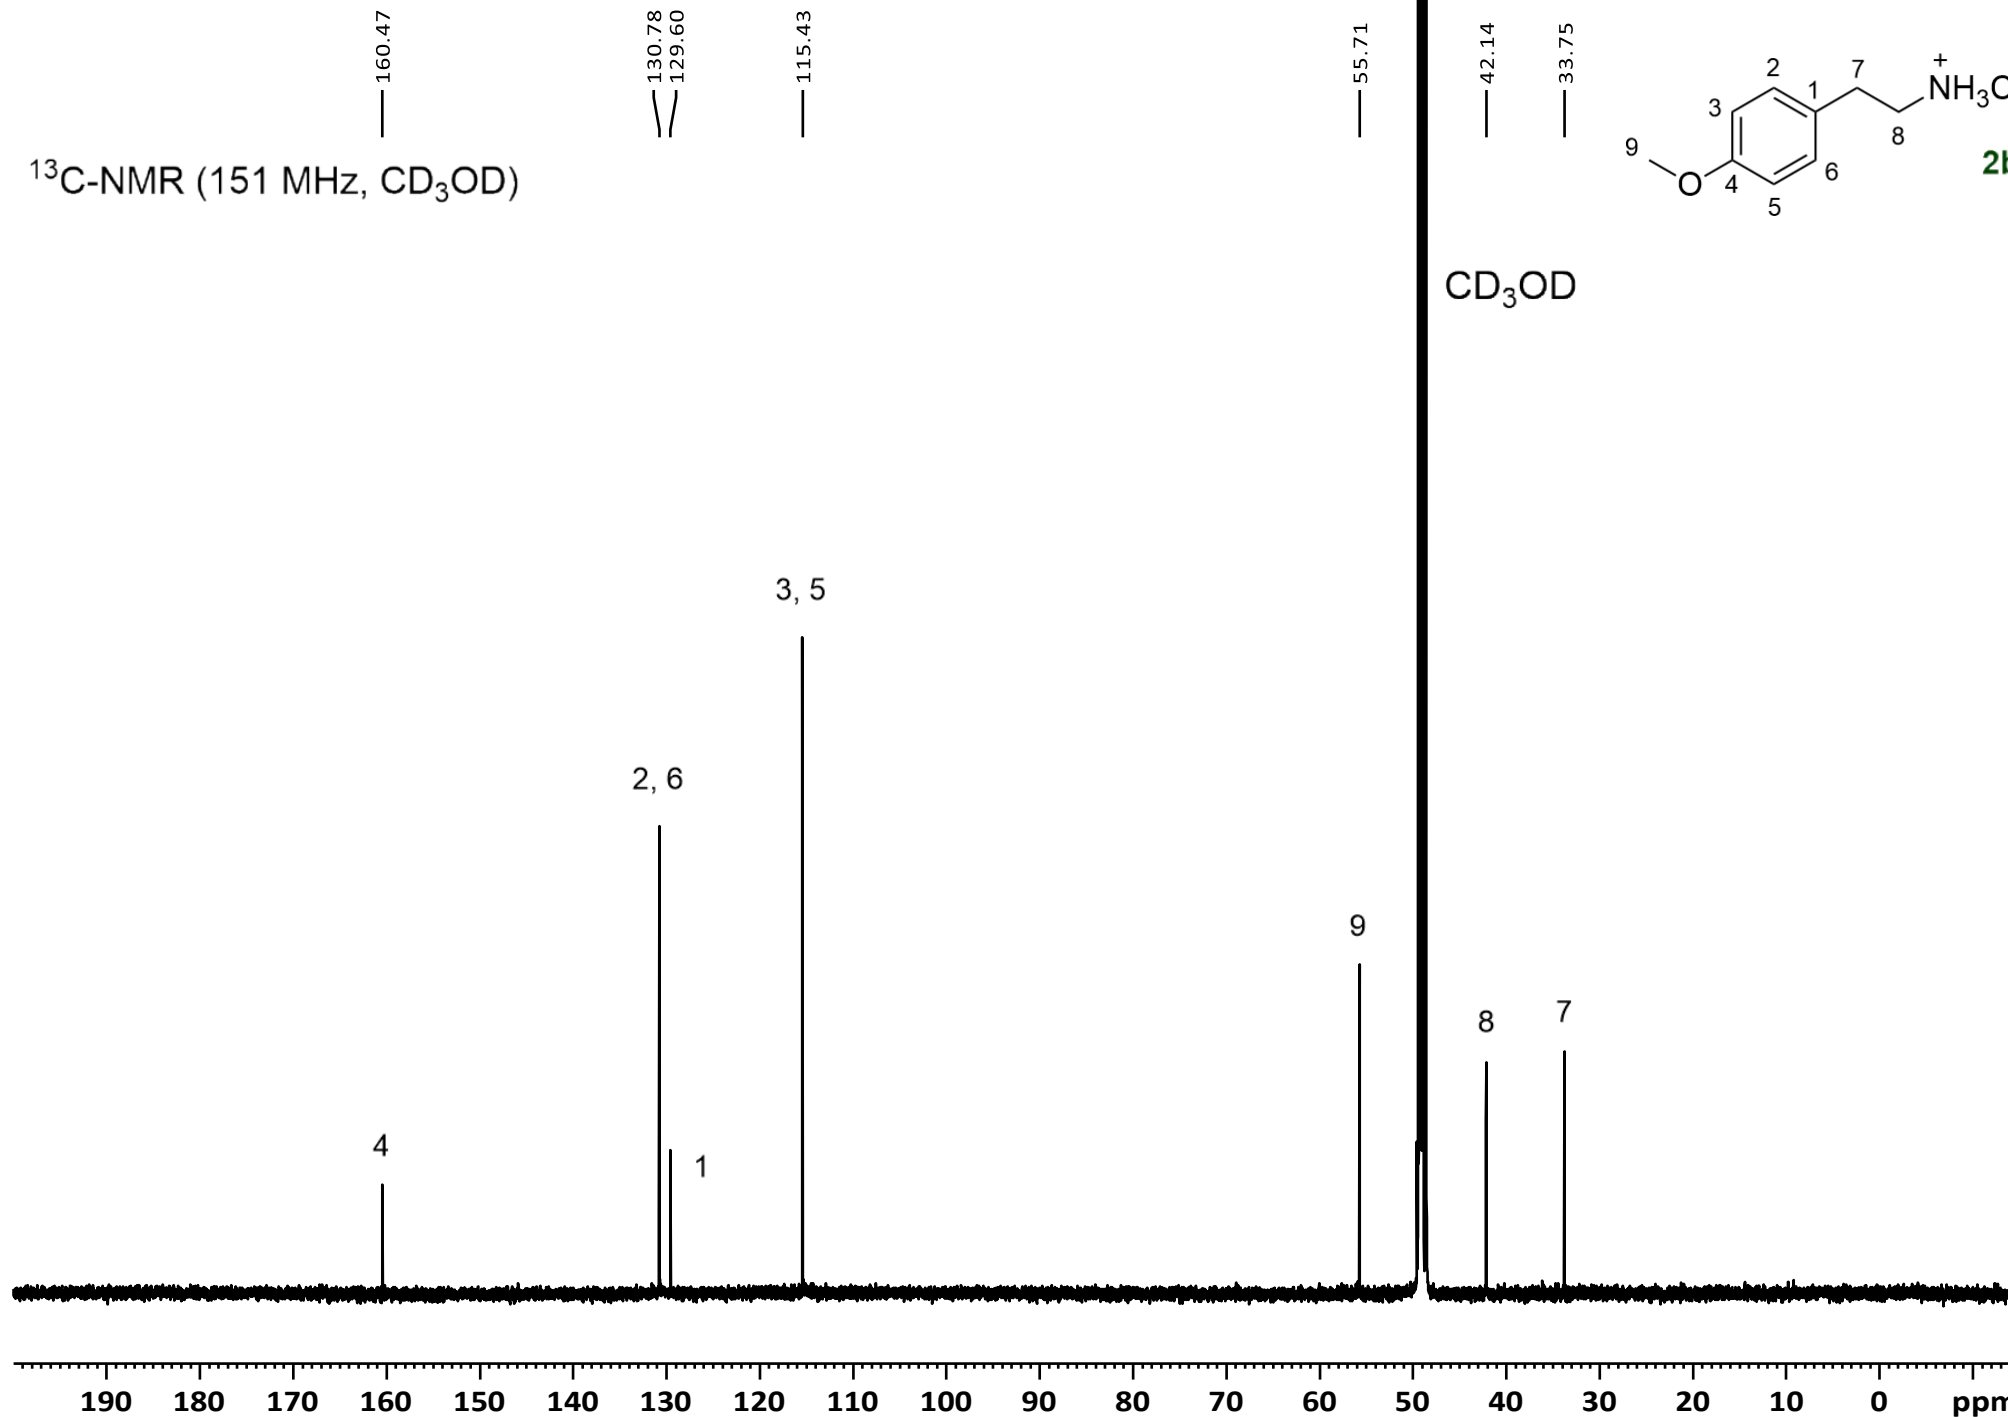

<sup>1</sup>H-NMR (600 MHz, CD<sub>3</sub>OD)

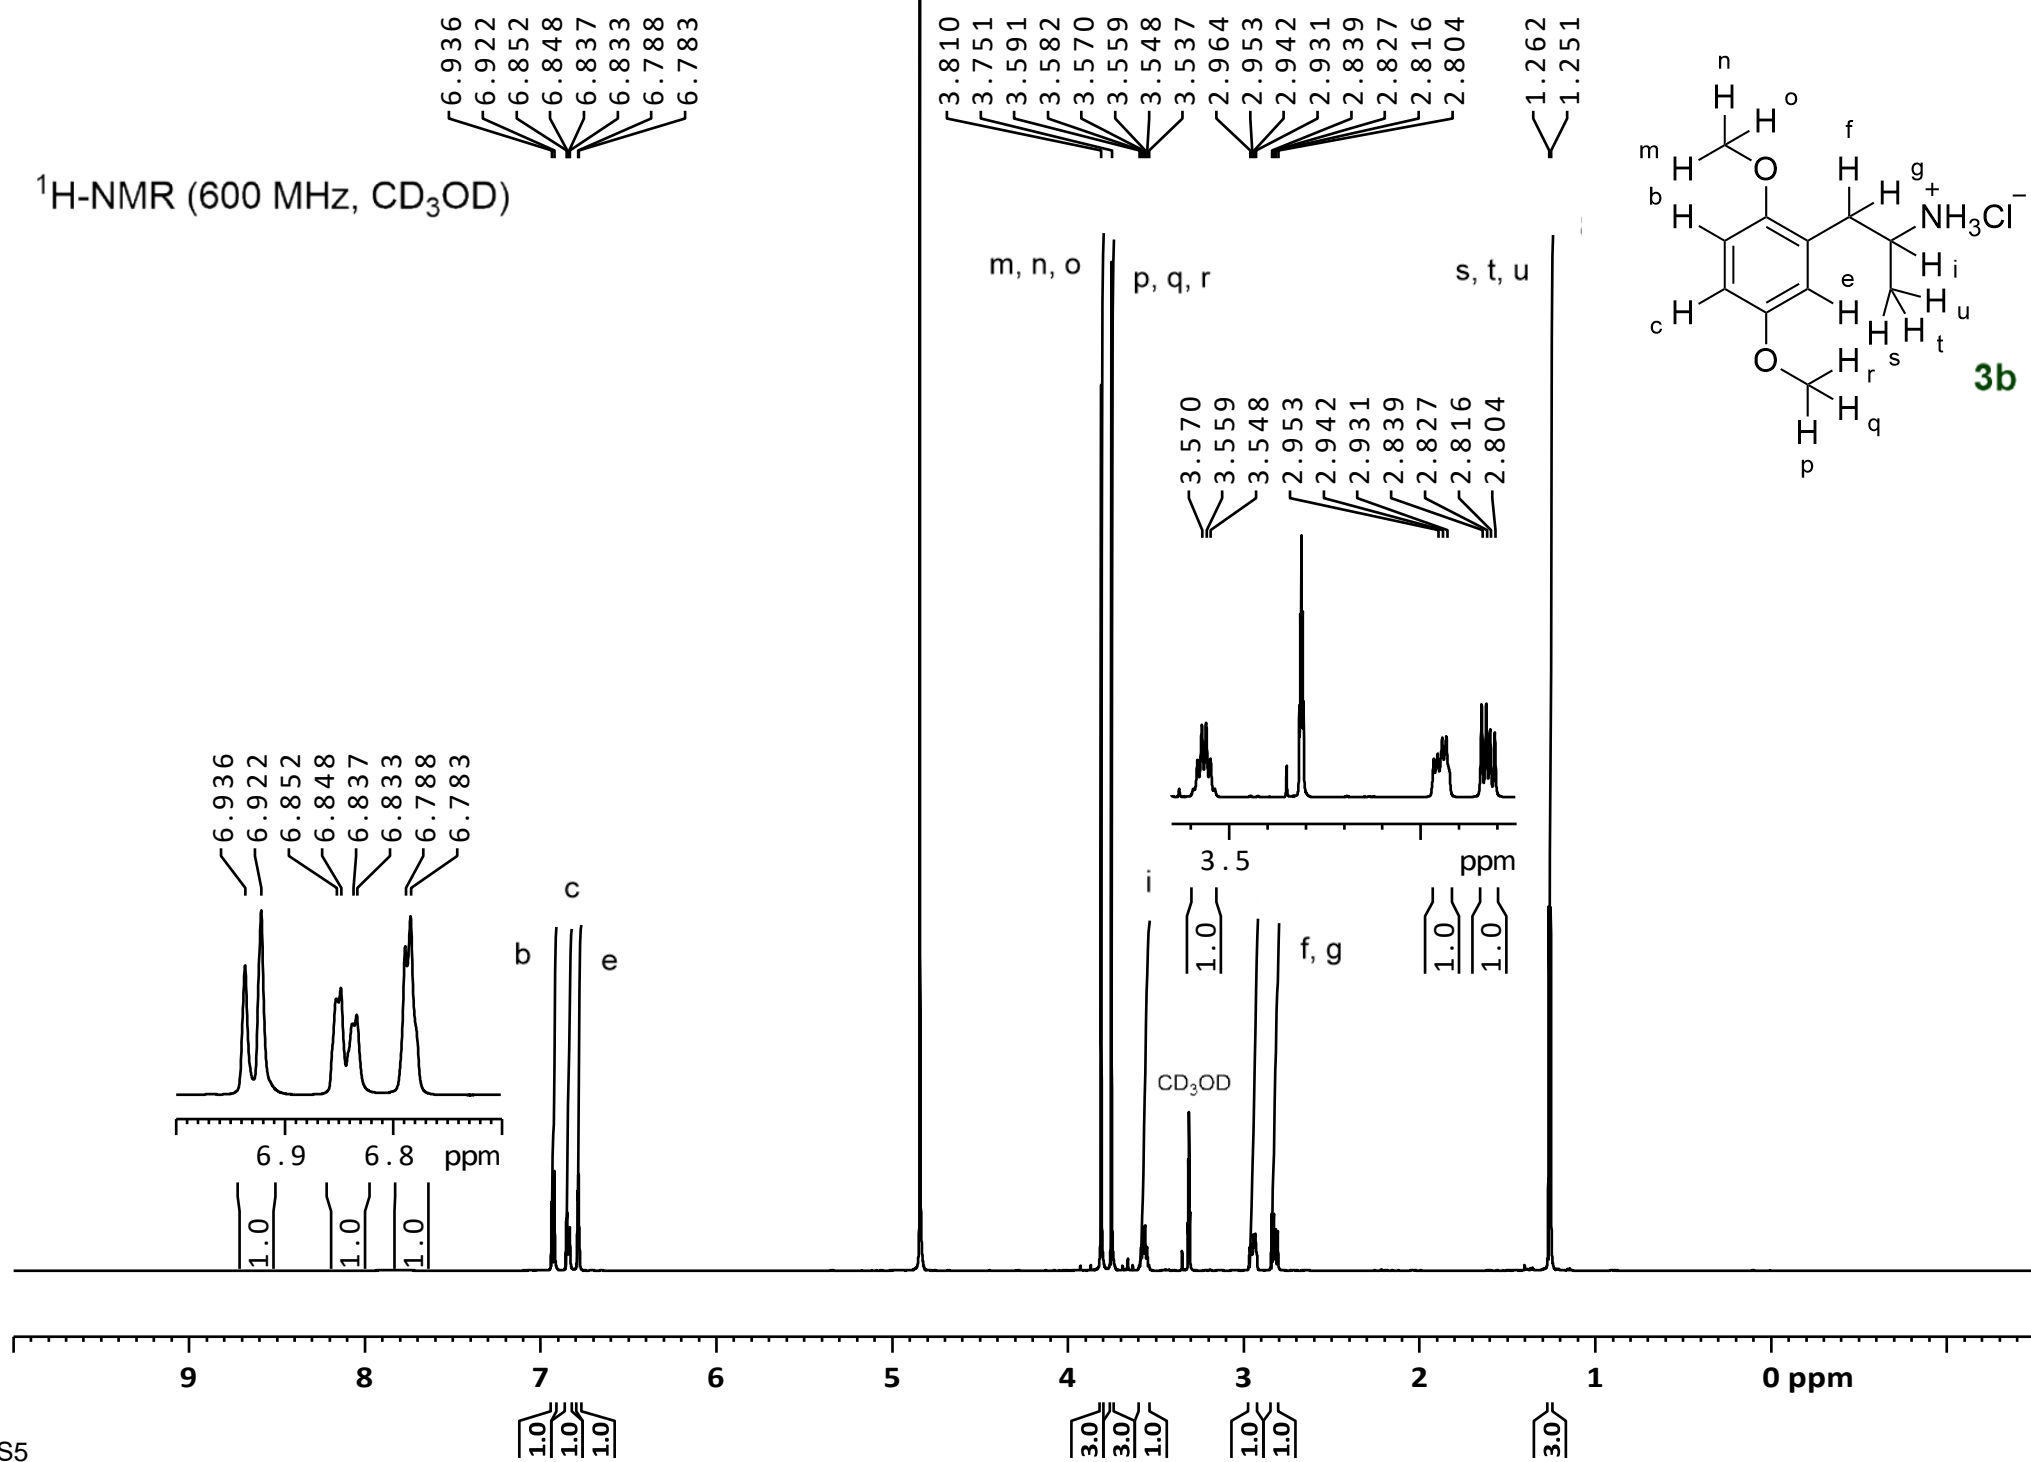

$^{13}\text{C}$ -NMR (151 MHz,  $\text{CD}_3\text{OD}$ )

155.14  
153.16

126.24

118.63

114.06

112.81

56.24  
56.12

36.85

18.56

$\text{CD}_3\text{OD}$

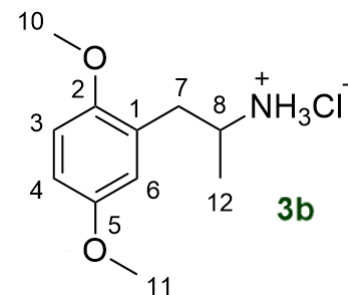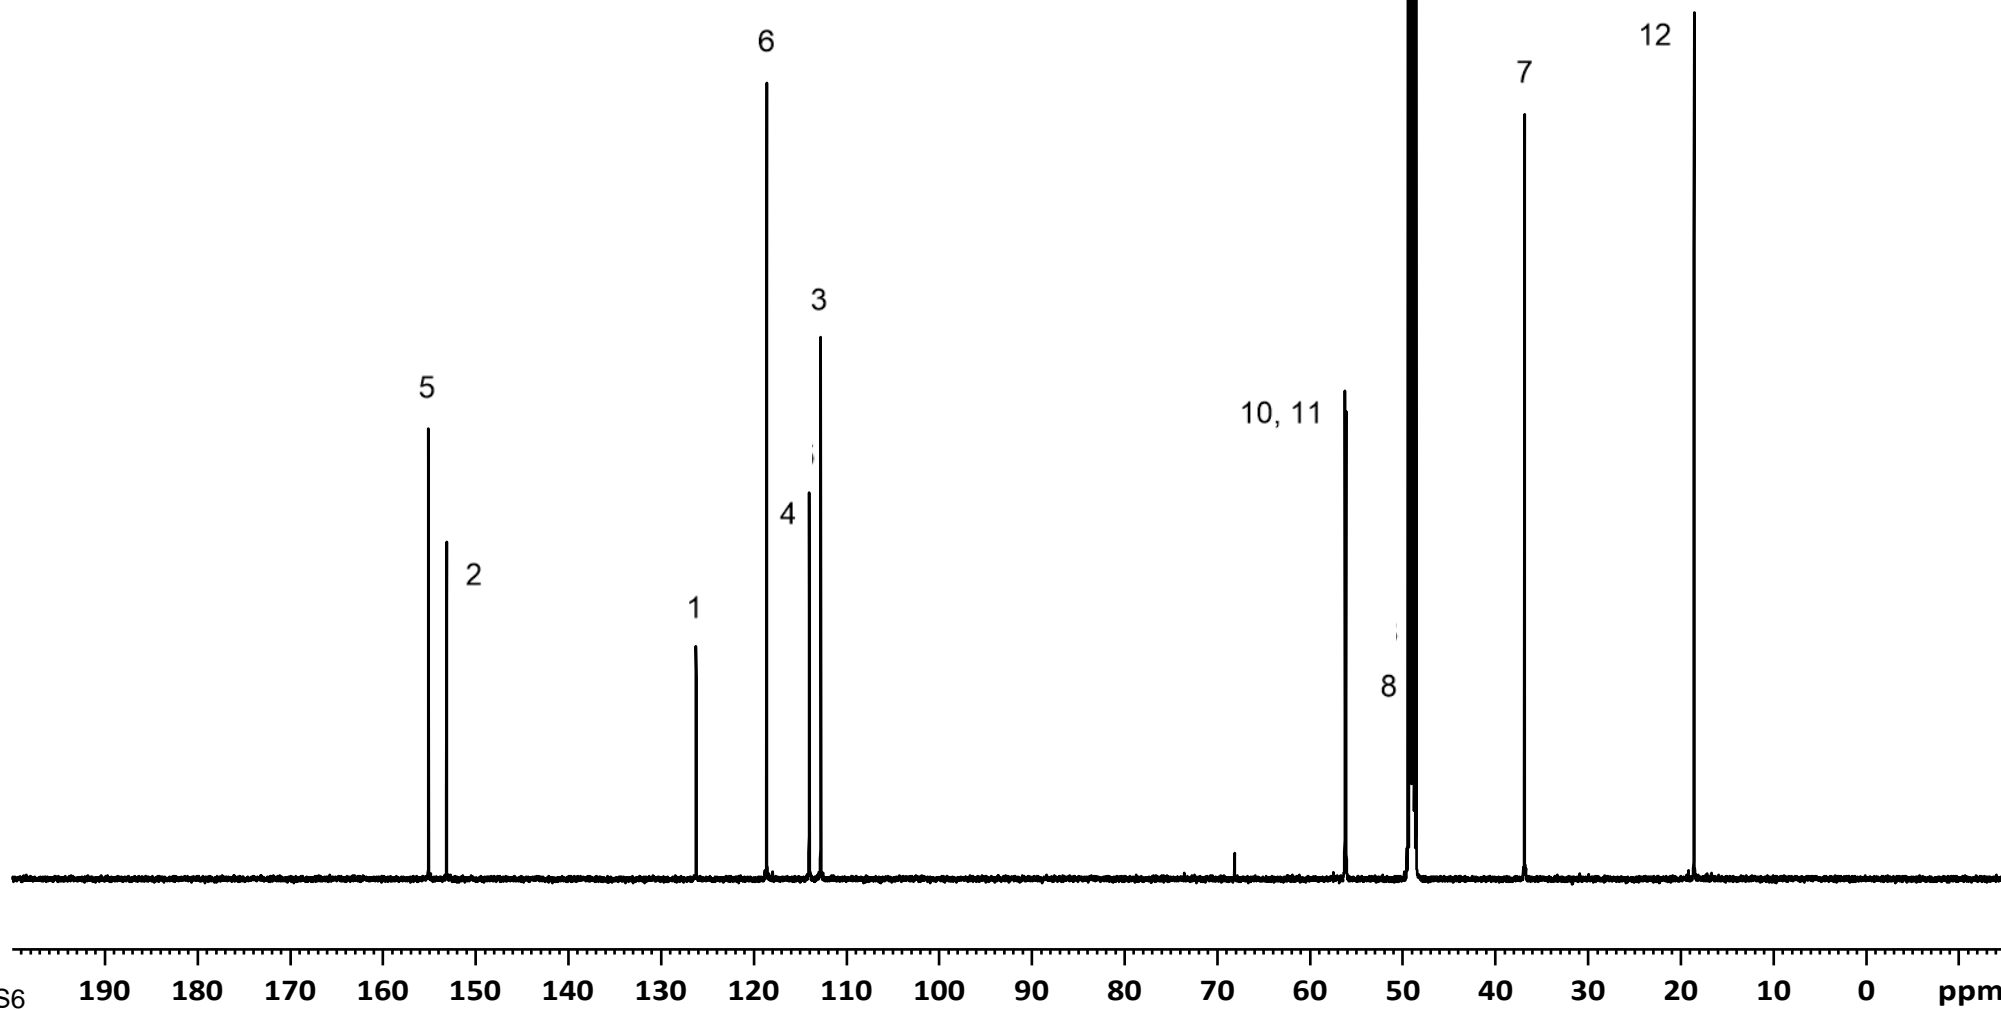



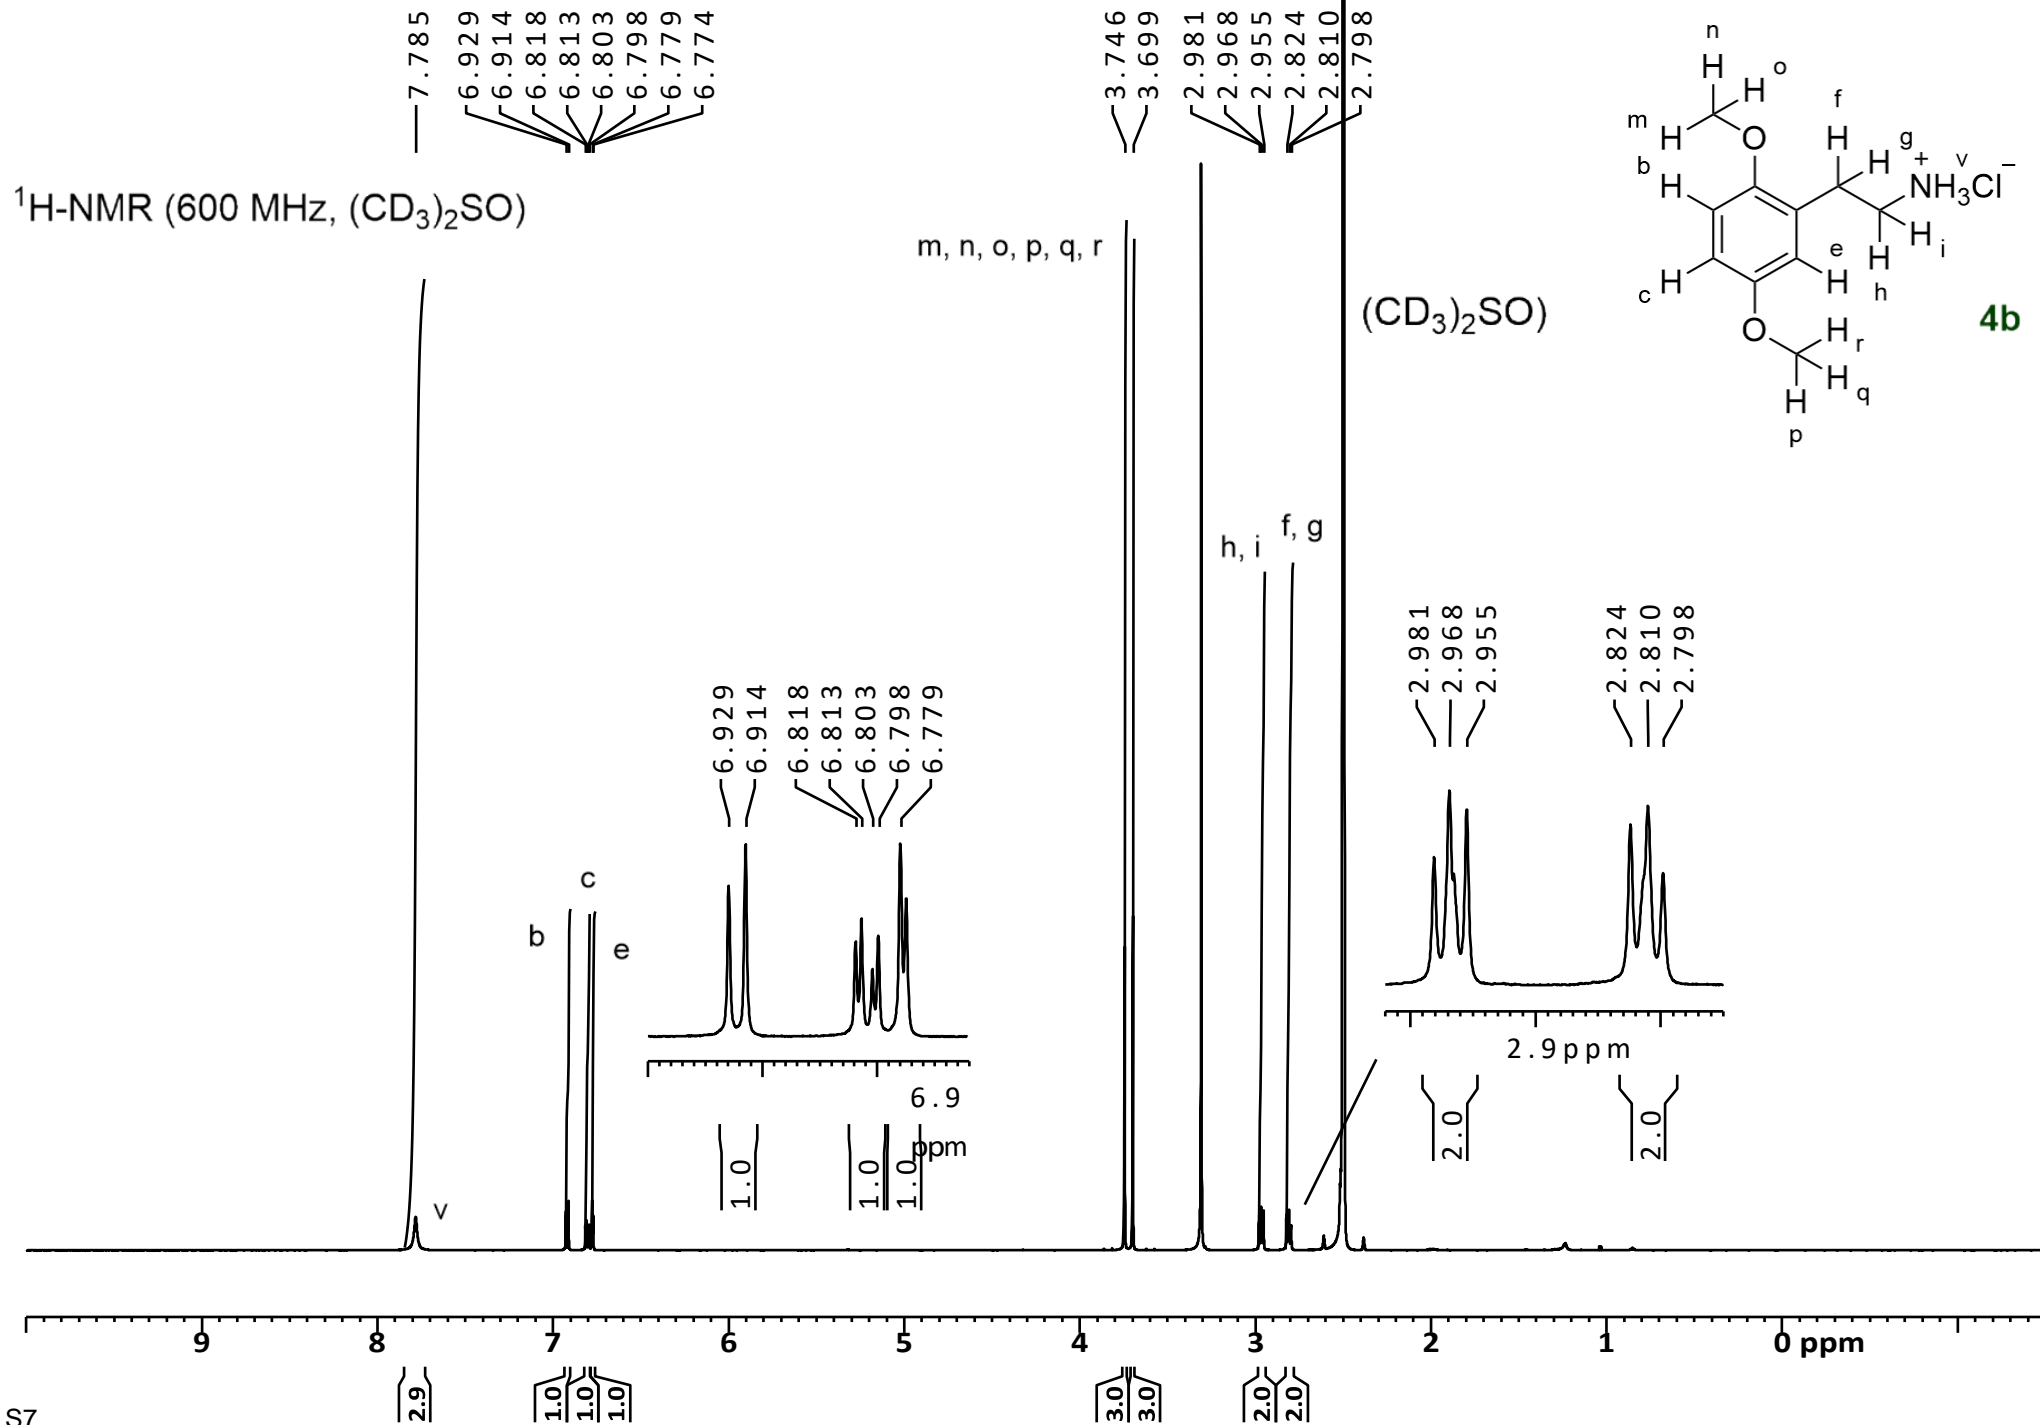

$^{13}\text{C}$ -NMR (151 MHz,  $(\text{CD}_3)_2\text{SO}$ )

153.05  
151.25

126.03

116.45  
112.18  
111.78

55.79  
55.32

38.65

28.14

$(\text{CD}_3)_2\text{SO}$

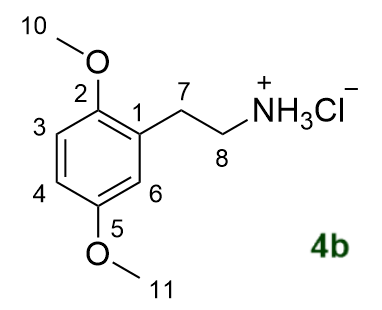

**4b**

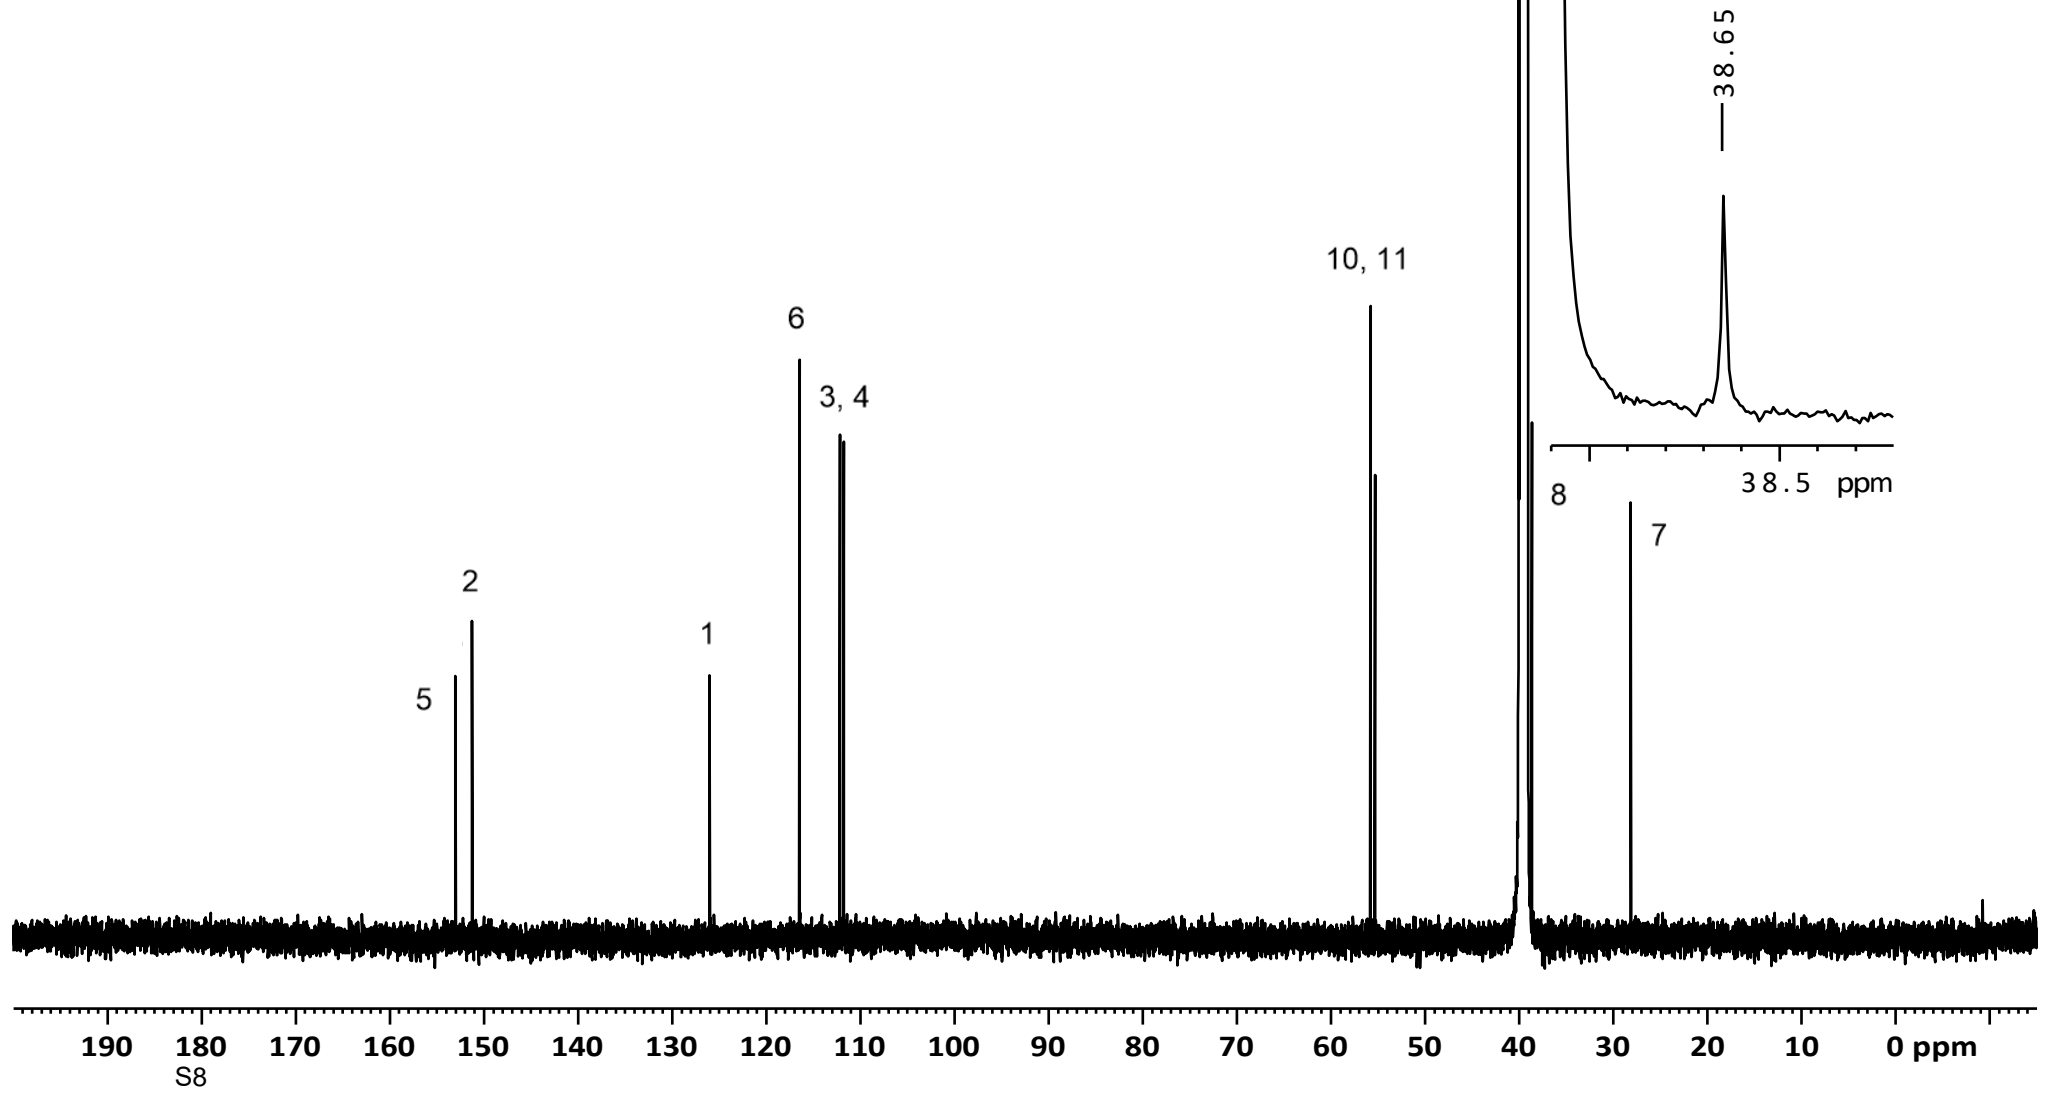

$^1\text{H-NMR}$  (600 MHz,  $\text{CD}_3\text{OD}$ )

6.812  
6.762

3.801  
3.784  
3.133  
3.121  
3.108  
2.936  
2.924  
2.912  
2.182

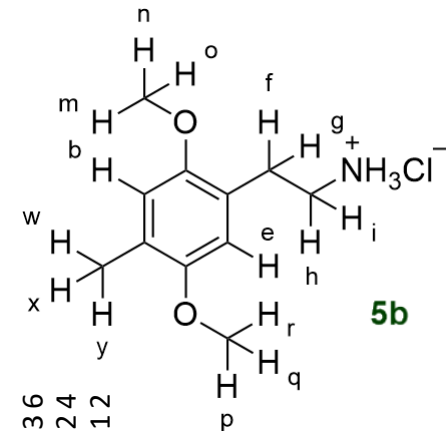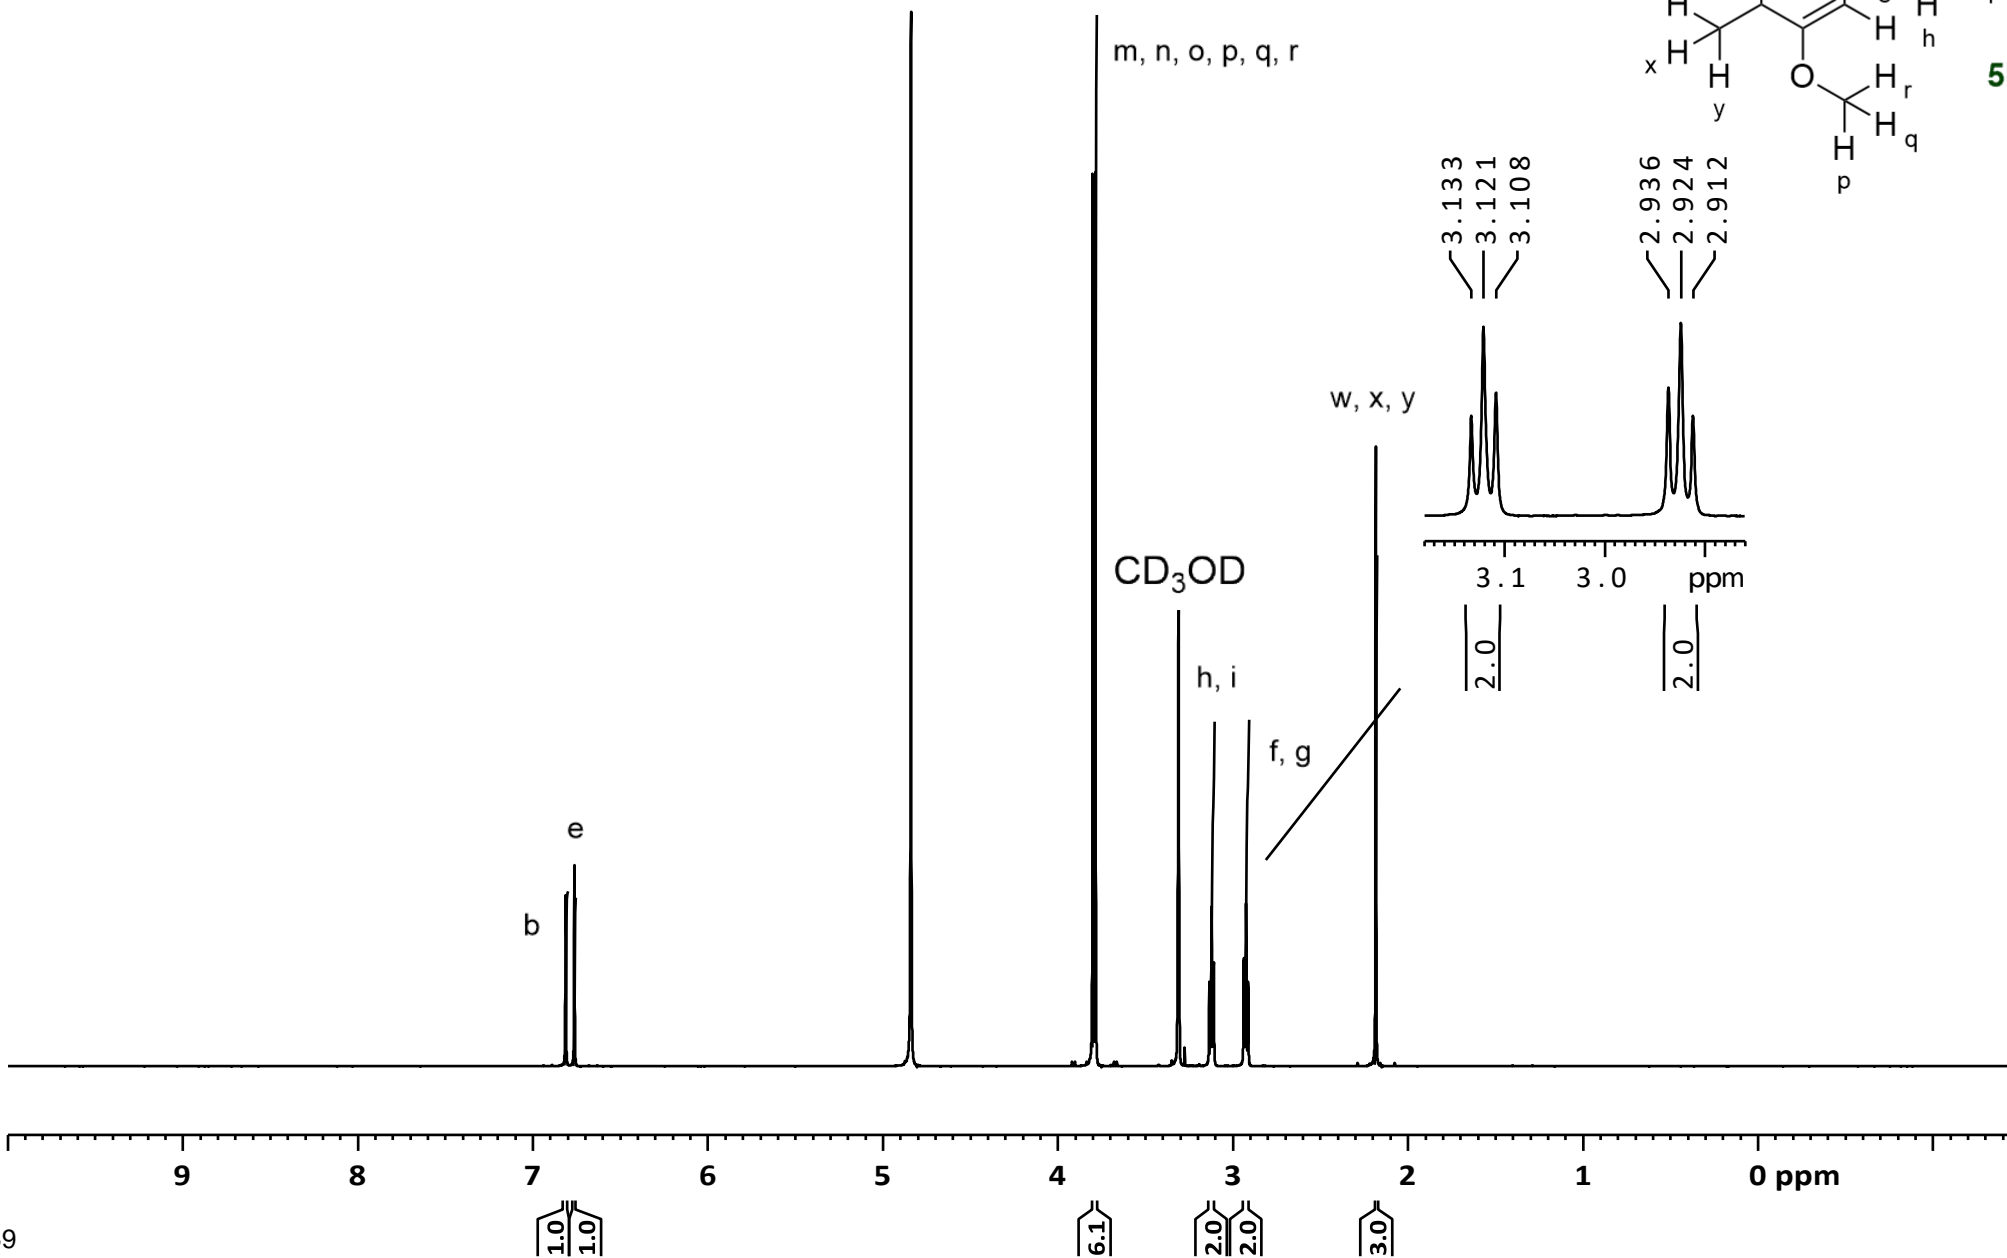

$^{13}\text{C}$ -NMR (151 MHz,  $\text{CD}_3\text{OD}$ )

153.22  
152.65

127.73  
123.38

114.96  
114.24

56.48  
56.33

41.07

29.81

16.27

$\text{CD}_3\text{OD}$

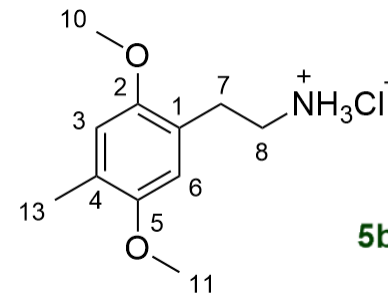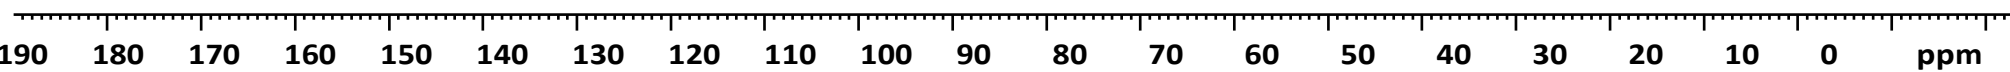

$^1\text{H-NMR}$  (400 MHz,  $\text{CD}_3\text{OD}$ )

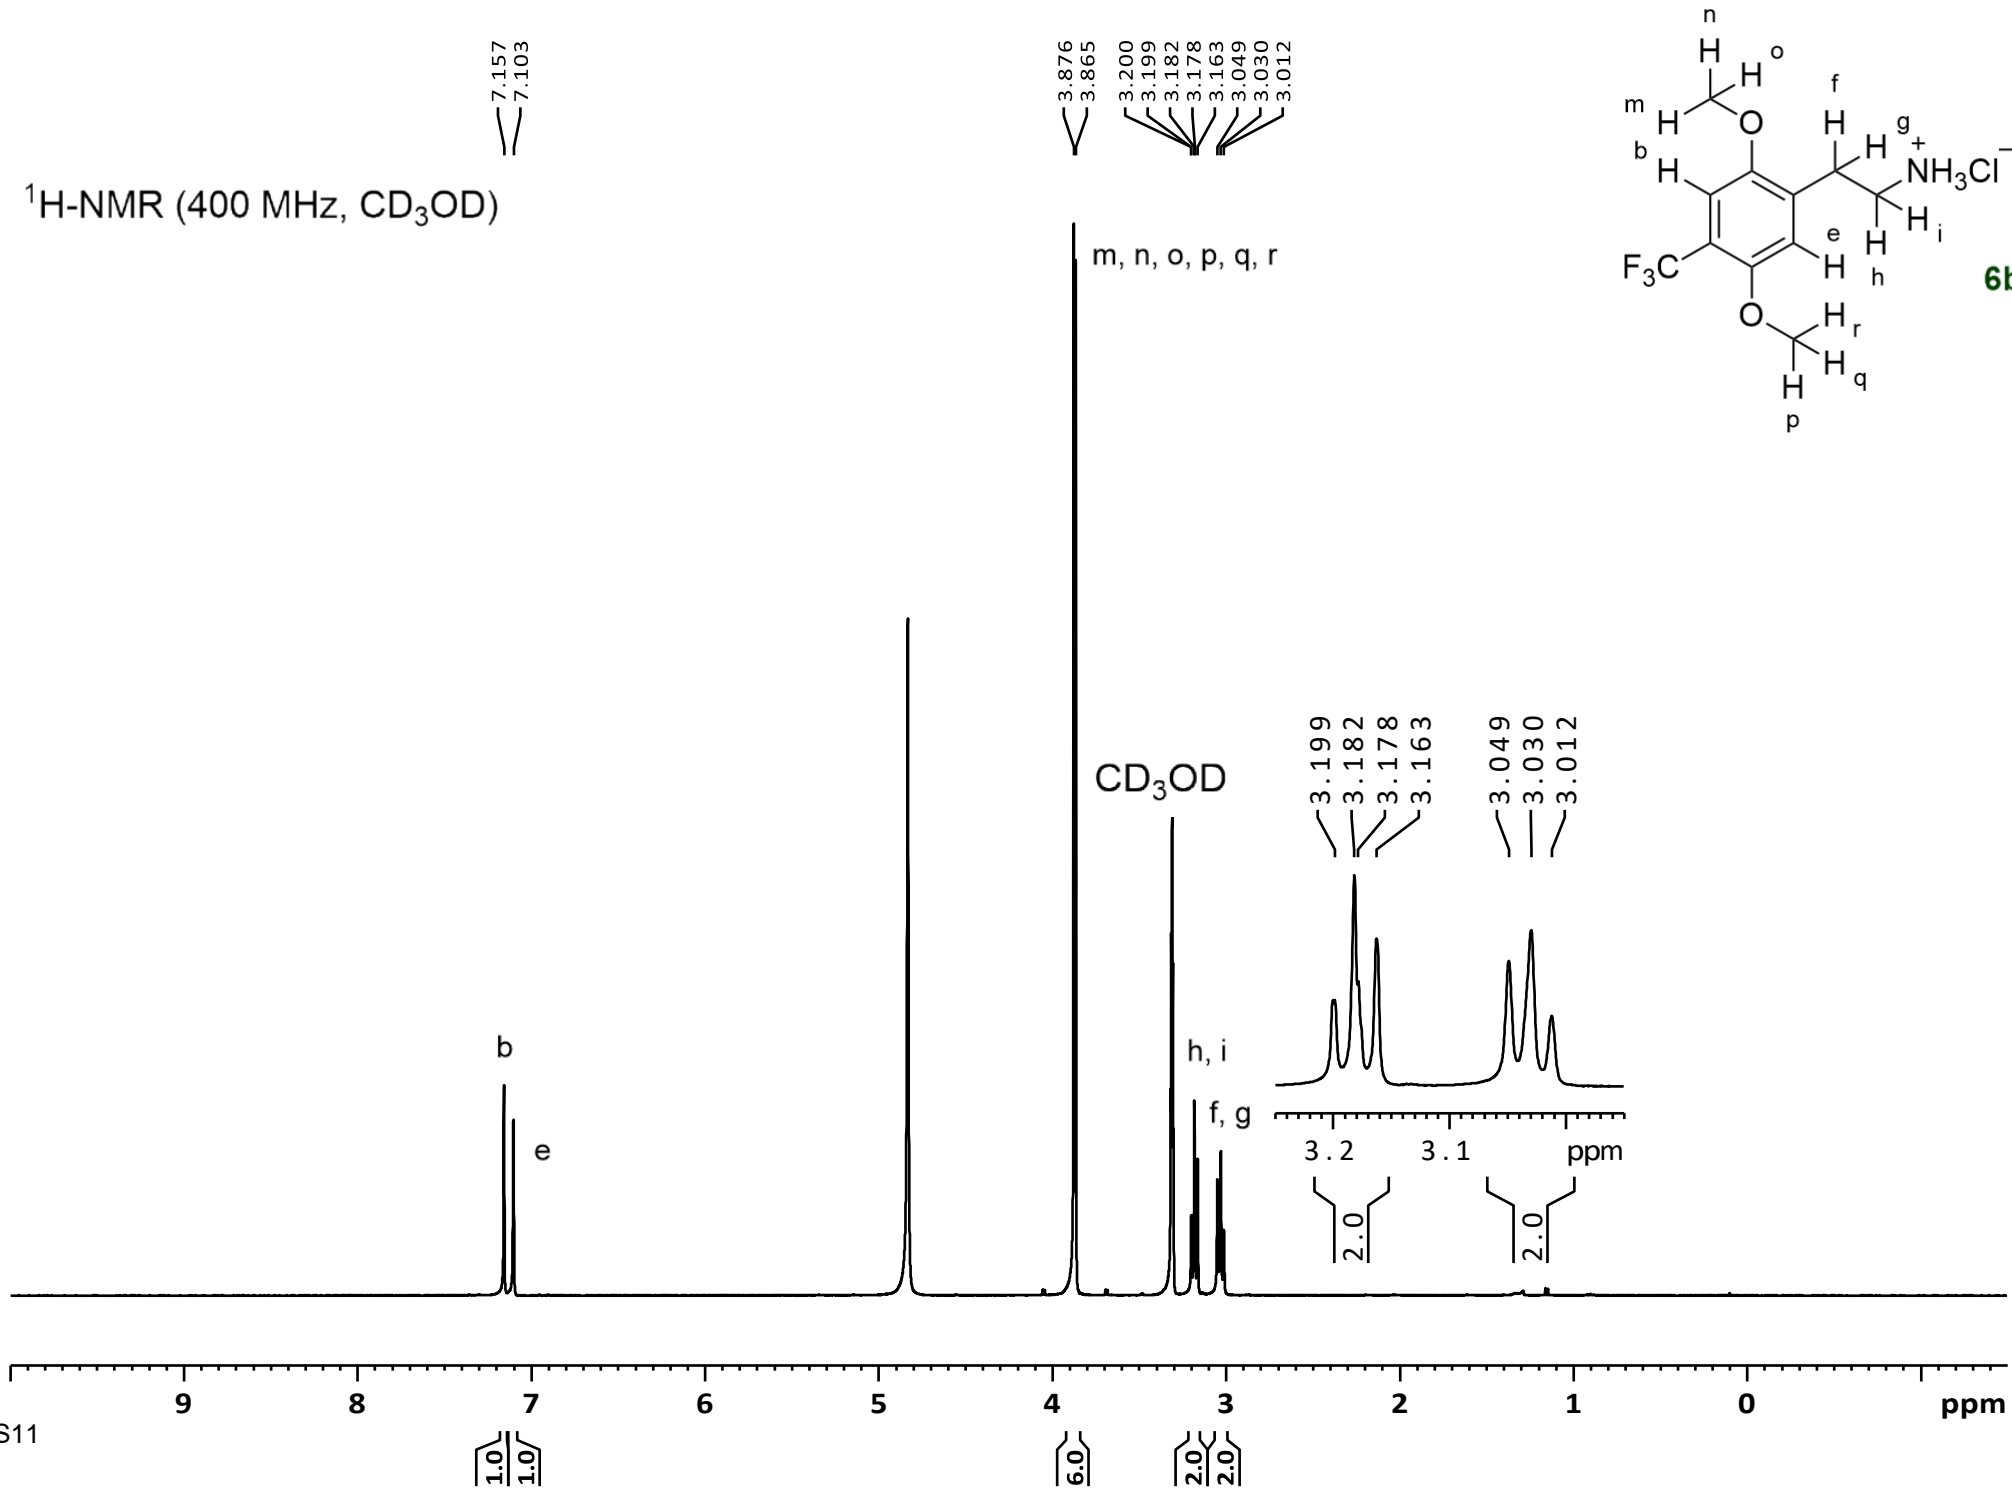

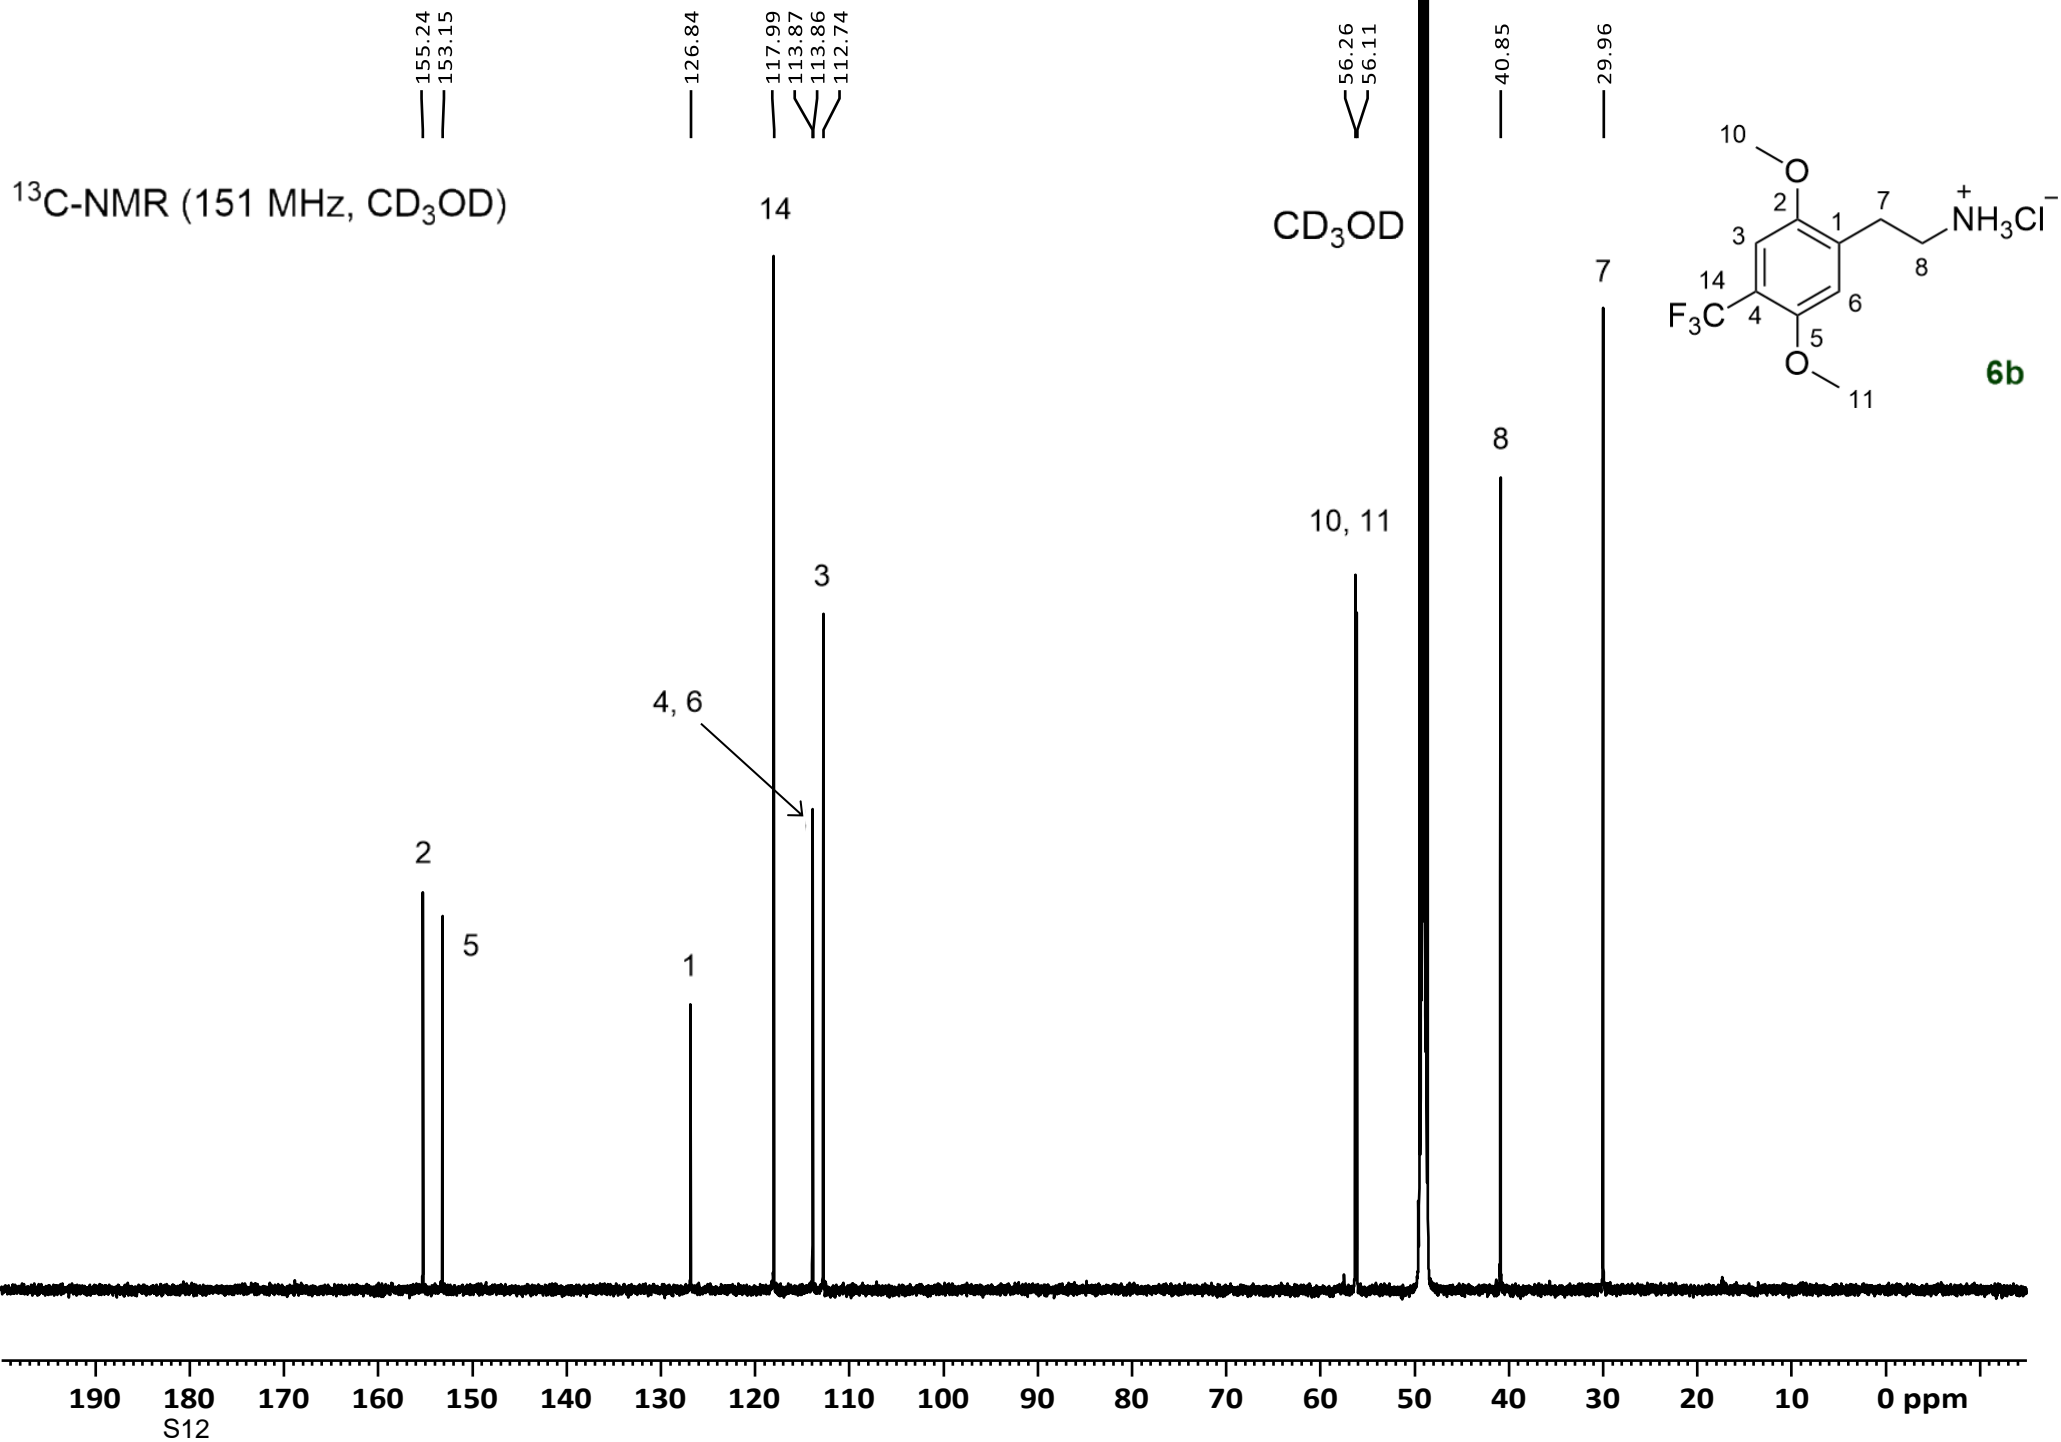

$^1\text{H-NMR}$  (600 MHz,  $\text{D}_2\text{O}$ )

$\text{D}_2\text{O}$

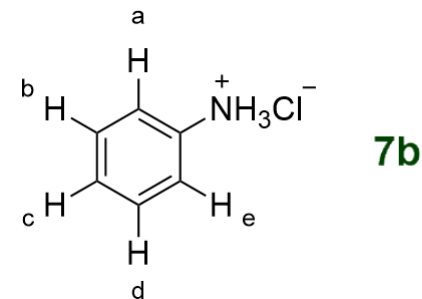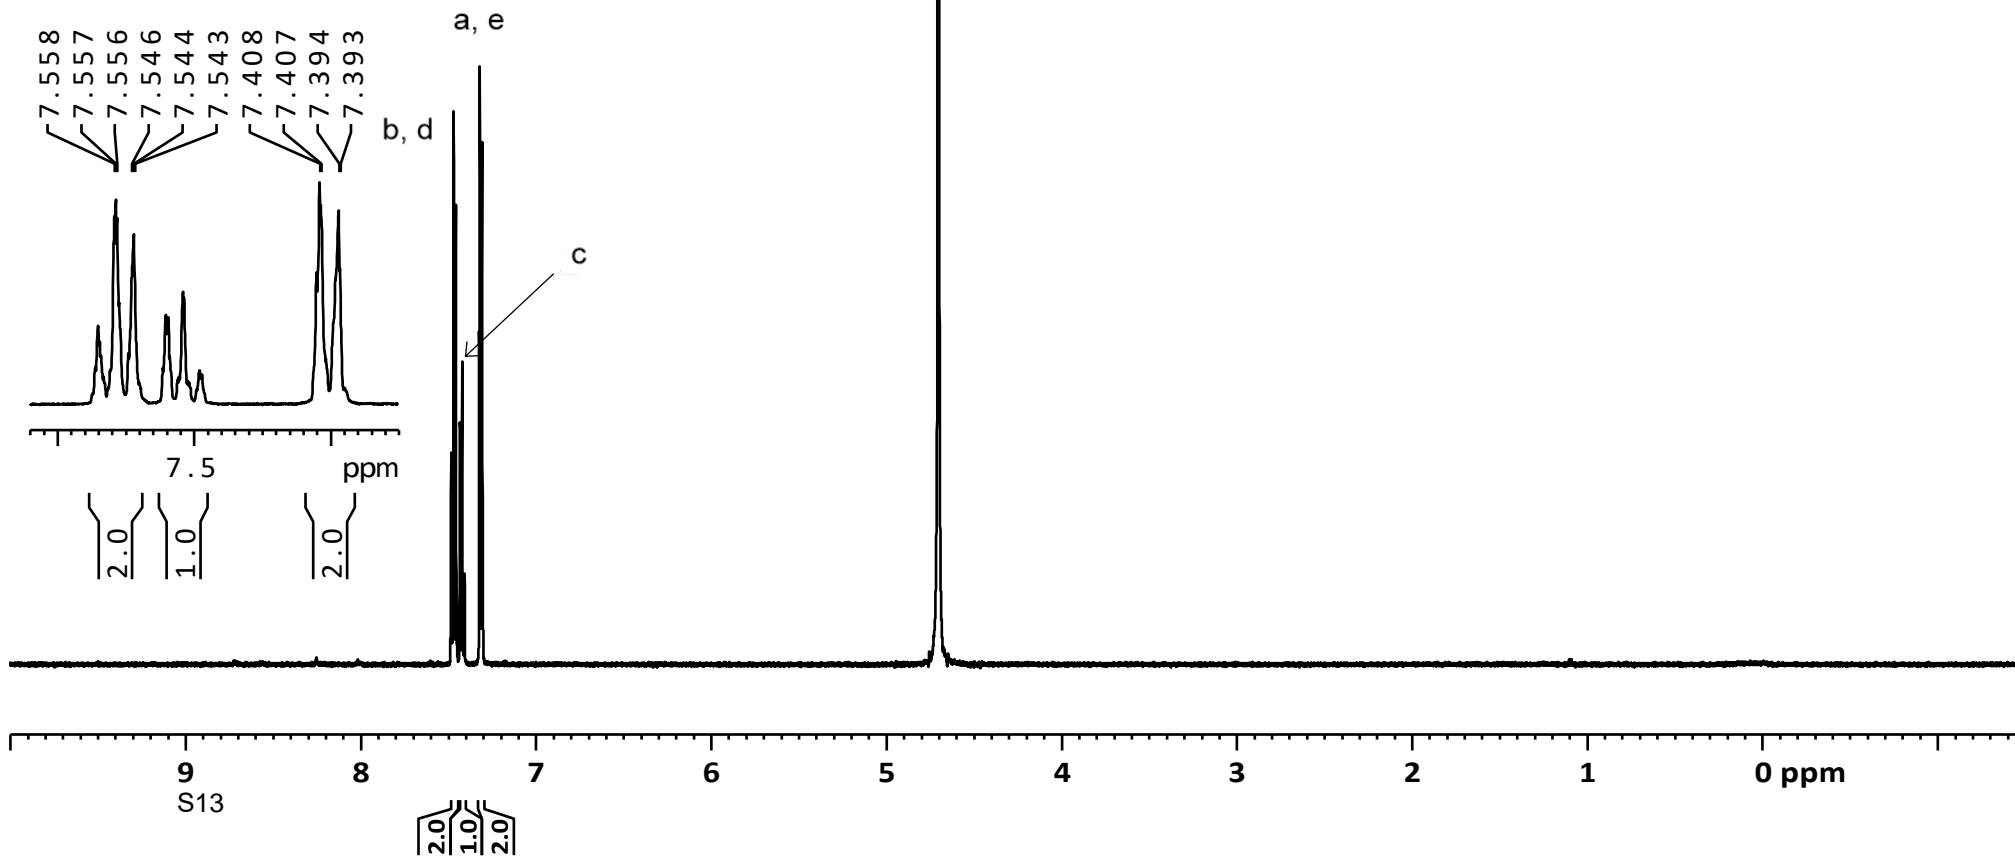

$^{13}\text{C}$ -NMR (151 MHz,  $\text{D}_2\text{O}$ )

130.64  
130.07  
128.67  
122.50

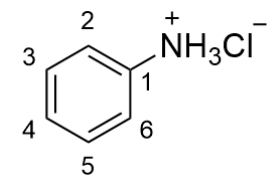

**7b**

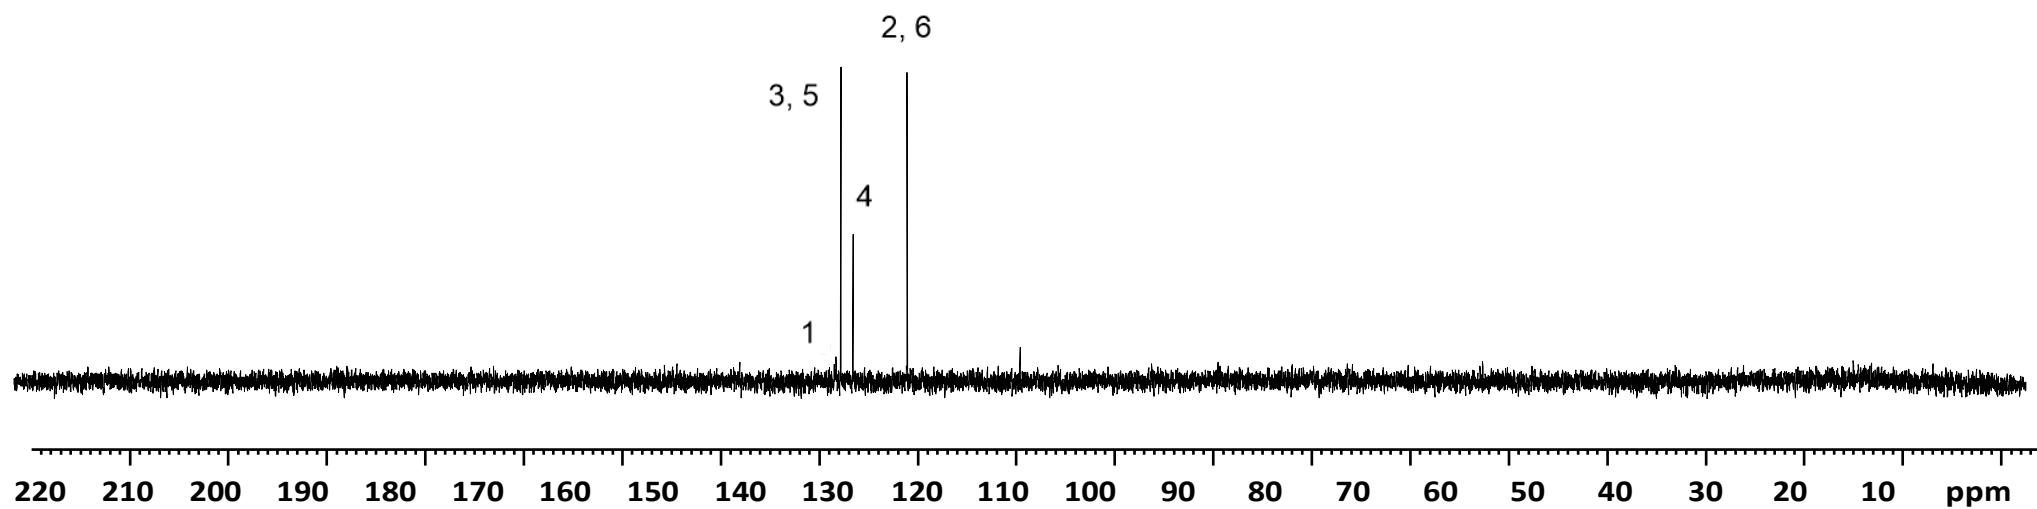



$^1\text{H-NMR}$  (600 MHz,  $\text{D}_2\text{O}$ )

7.67  
7.67  
7.66  
7.66  
7.65  
7.65  
7.32  
7.31  
7.31  
7.30  
7.30  
7.30  
7.29

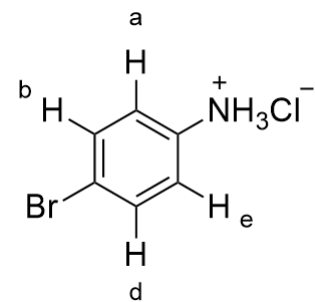

**8b**

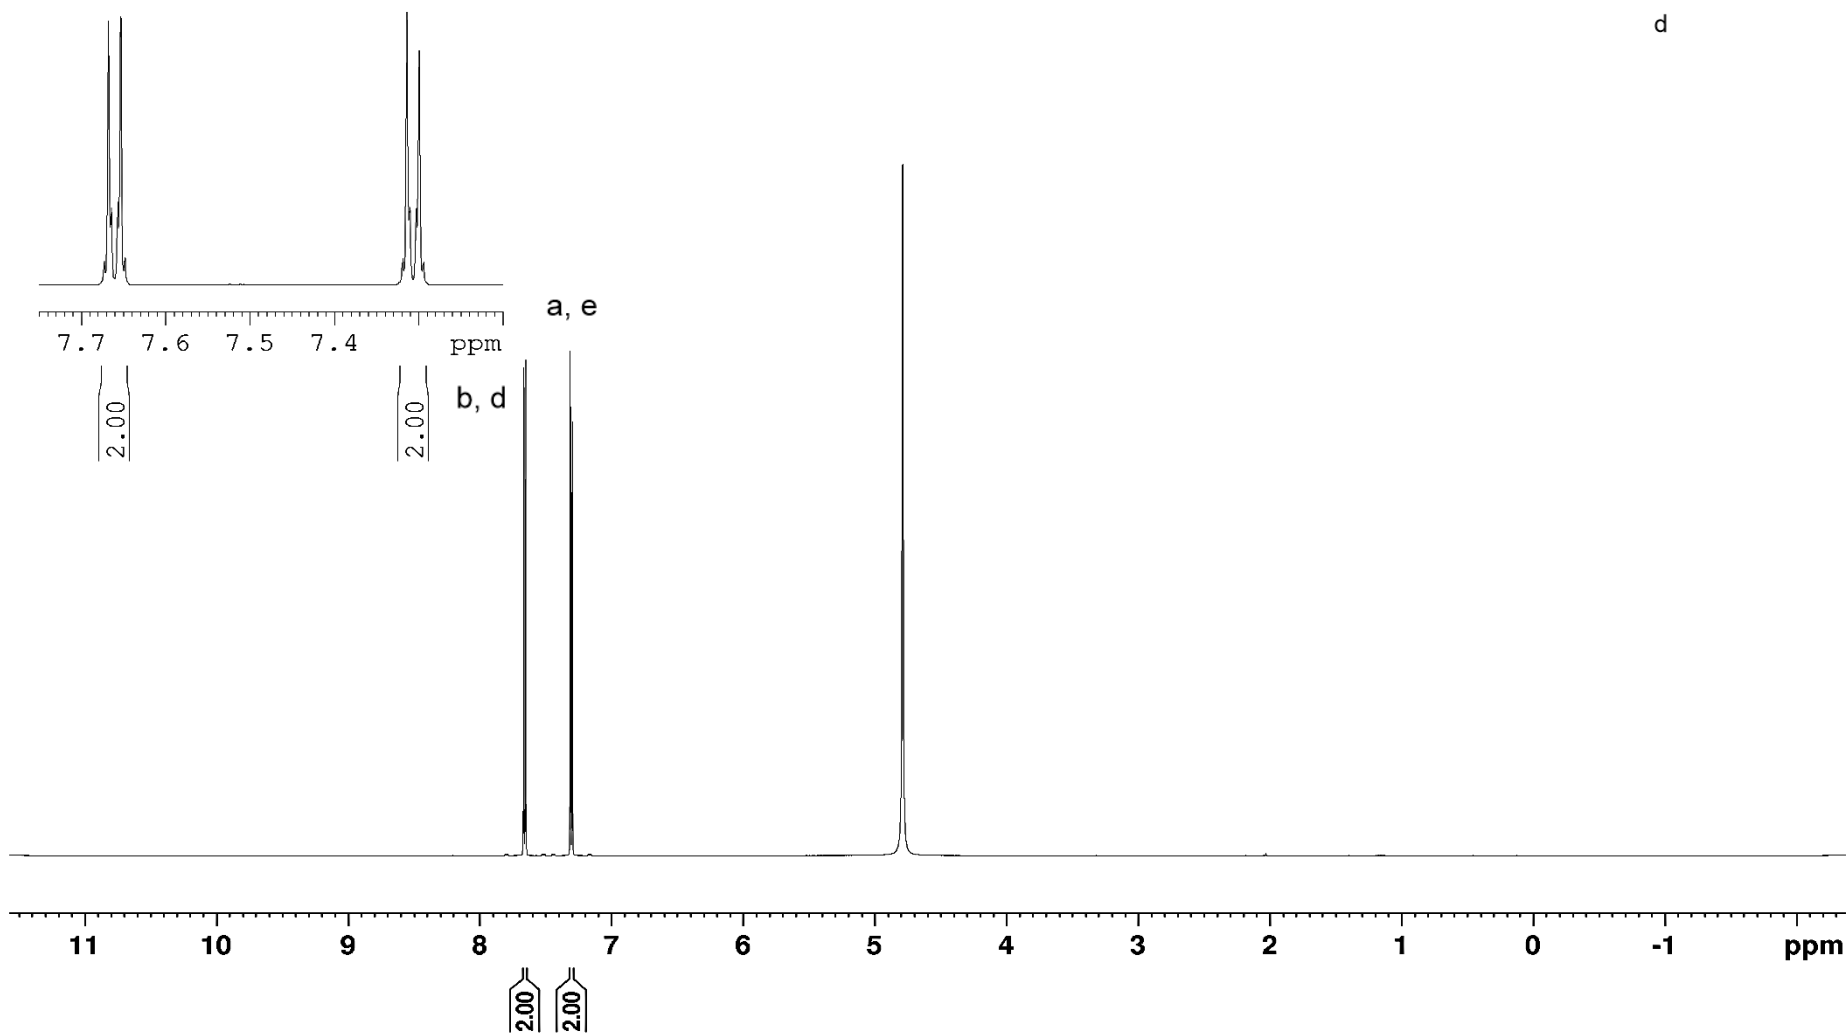

$^{13}\text{C}$ -NMR (151 MHz,  $\text{D}_2\text{O}$ )

133.06  
129.01  
124.77  
122.41  
3, 5  
2, 6

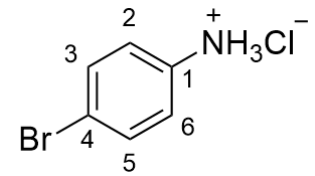

**8b**

1  
4

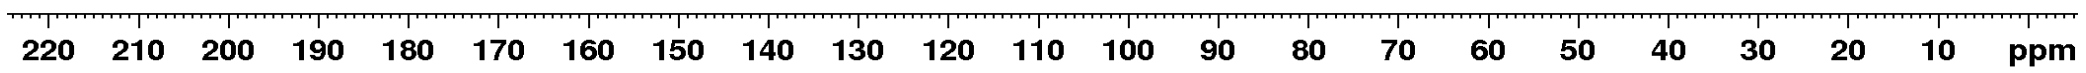

<sup>1</sup>H-NMR (400 MHz, CDCl<sub>3</sub>)

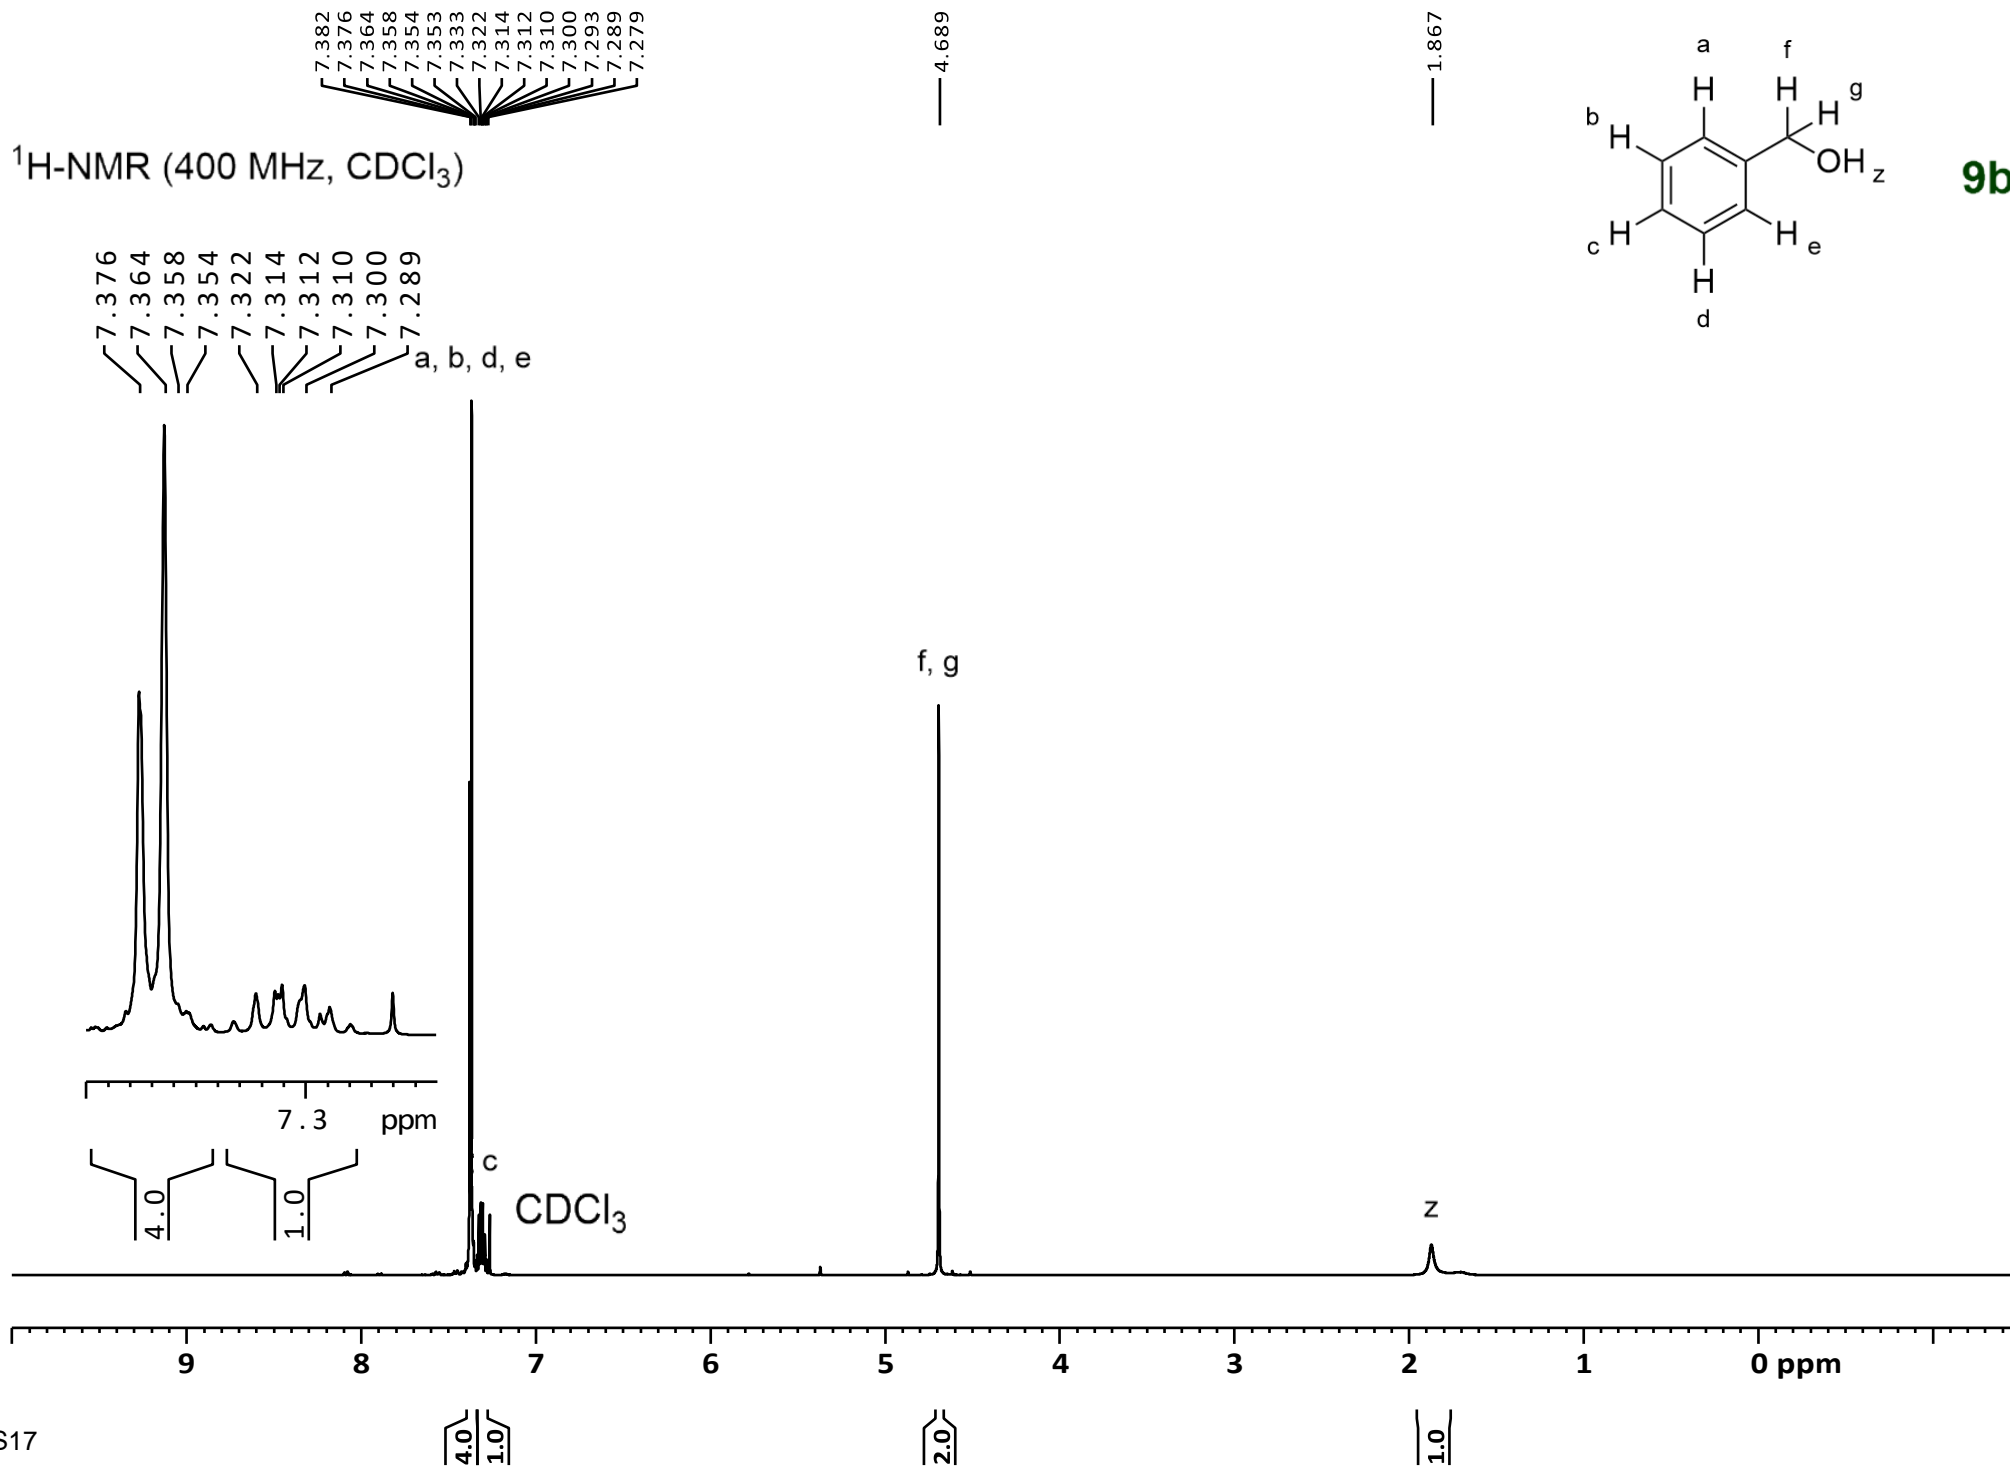

$^{13}\text{C}$ -NMR (151 MHz,  $\text{CDCl}_3$ )

140.97

128.69  
127.79  
127.12

65.48

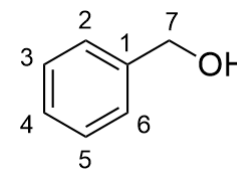

9b

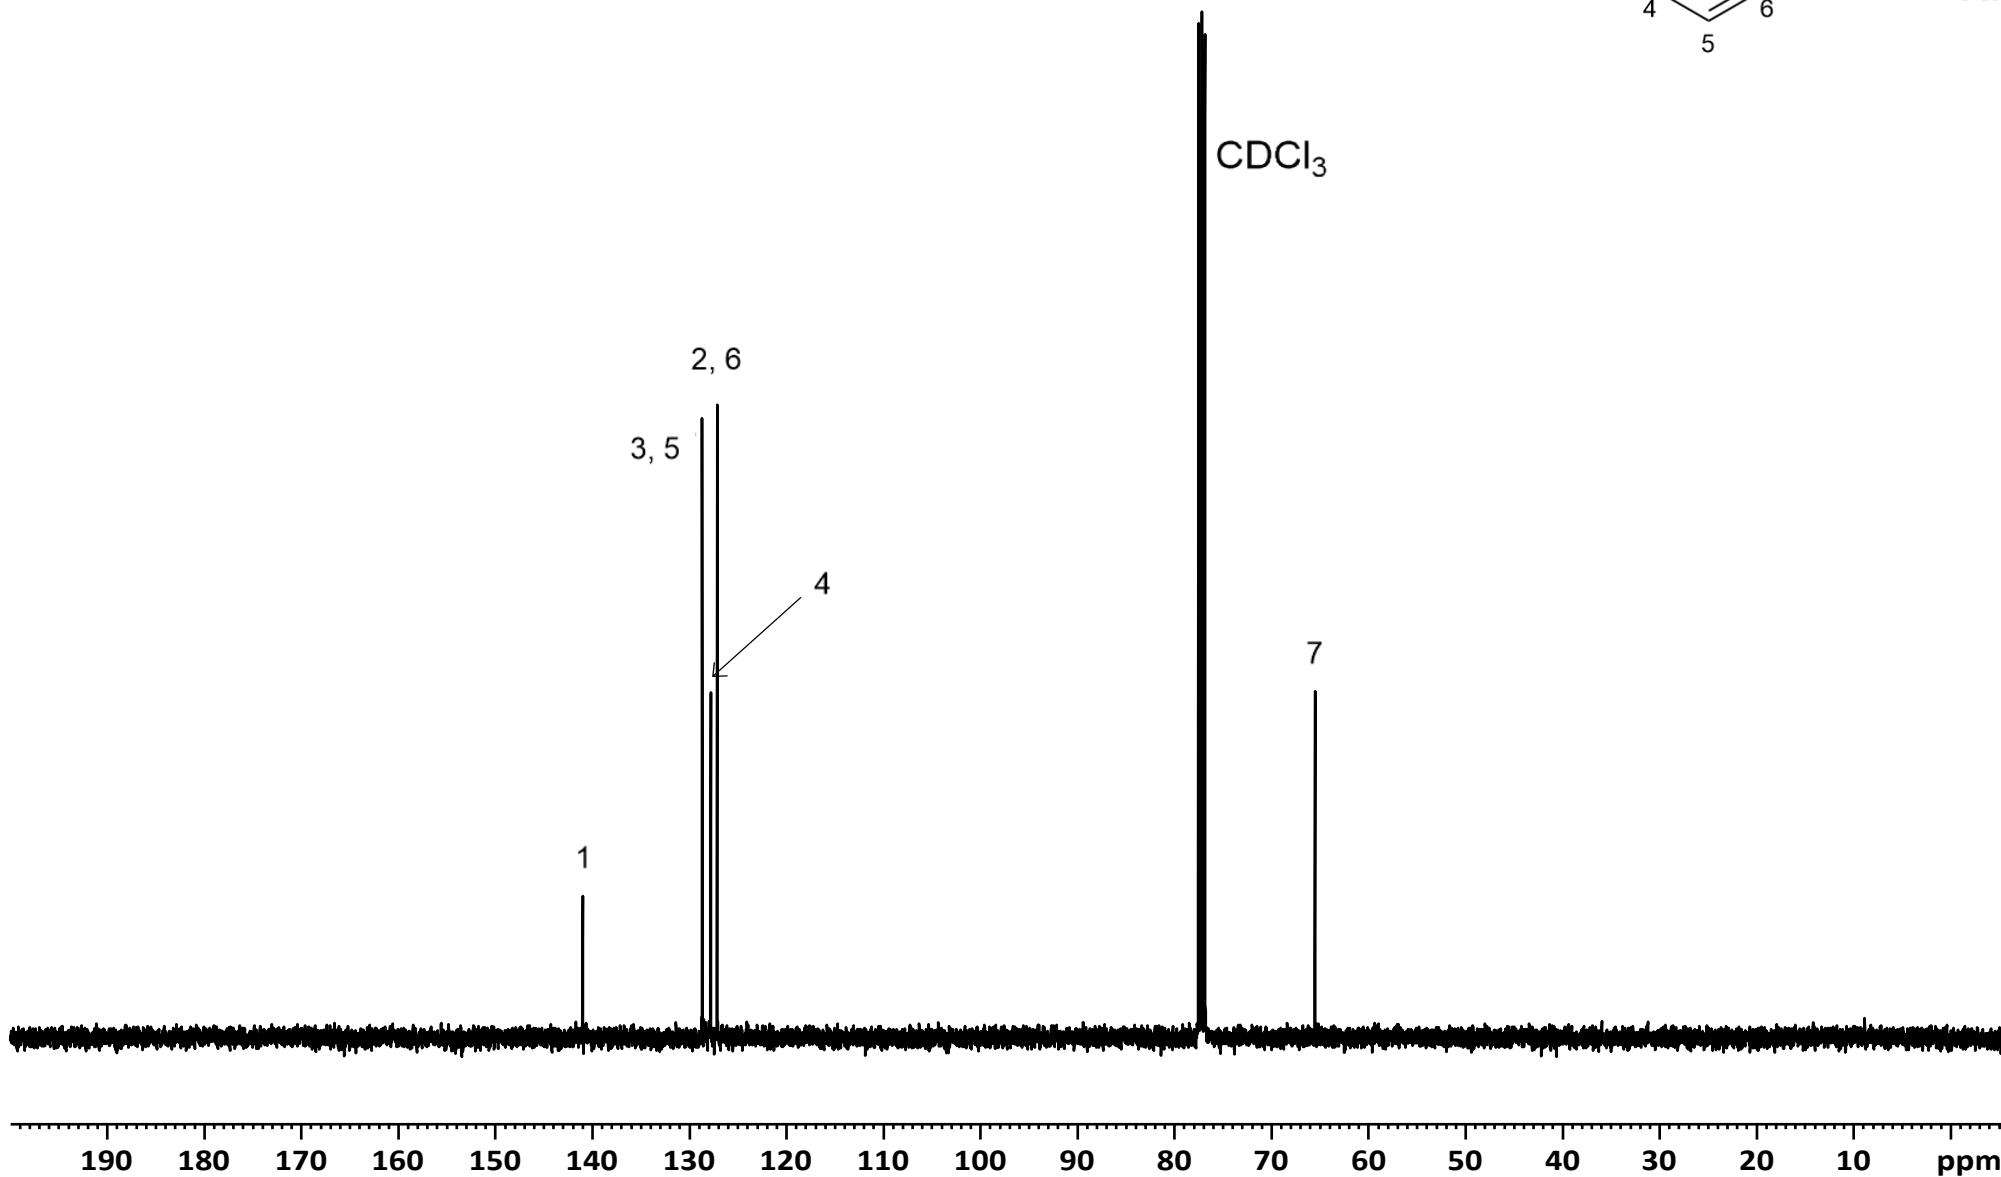

**Table S1:** All the parameters tested during the optimization process are listed, with their corresponding isolated product yields. Methanol, 2-propanol, and water were independently evaluated as reaction solvents. In each case, the extraction process turned out to be troublesome and the product could not be isolated.

|                                                            | Assessed parameters                                                                                   | Time (min.) | Temperature (°C) | Yield (%) |
|------------------------------------------------------------|-------------------------------------------------------------------------------------------------------|-------------|------------------|-----------|
| <b>Time test</b>                                           | CuCl <sub>2</sub> 0,1 eq                                                                              | 10          | 80               | 82        |
|                                                            | CuCl <sub>2</sub> 0,1 eq                                                                              | 15          | 80               | 82        |
|                                                            | CuCl <sub>2</sub> 0,1 eq                                                                              | 30          | 80               | 65        |
|                                                            | CuCl <sub>2</sub> 0,1 eq                                                                              | 60          | 80               | 60        |
|                                                            | CuCl <sub>2</sub> 0,1 eq                                                                              | 80          | 80               | 57        |
|                                                            | CuCl <sub>2</sub> 0,1 eq                                                                              | 90          | 80               | 48        |
| <b>Reagents test</b>                                       | CuCl <sub>2</sub> 0,05 eq                                                                             | 10          | 80               | 73        |
|                                                            | CuCl <sub>2</sub> 0,05 eq                                                                             | 30          | 80               | 56        |
|                                                            | NaBH <sub>4</sub> 3 eq.                                                                               | 10          | 80               | 59        |
|                                                            | CuCl <sub>2</sub> 0,1 eq / 10 min. stirring prior to CuCl <sub>2</sub> addition                       | 10          | 80               | 82        |
|                                                            | CuCl <sub>2</sub> 0,05 eq / 15 min. stirring prior to CuCl <sub>2</sub> addition                      | 10          | 80               | 71        |
|                                                            | CuCl <sub>2</sub> 0,025 eq / 15 min. stirring prior to CuCl <sub>2</sub> addition                     | 30          | 80               | 42        |
|                                                            | CuCl <sub>2</sub> 0,05 eq / NaBH <sub>4</sub> and nitrostyrene order switched                         | 10          | 80               | 68        |
|                                                            | CuCl <sub>2</sub> 0,1 eq / CuCl <sub>2</sub> addition between NaBH <sub>4</sub> split in two portions | 80          | 80               | 48        |
|                                                            | CuCl <sub>2</sub> 0,1 eq / DETA addition                                                              | 10          | 80               | 80        |
|                                                            | CuCl <sub>2</sub> 0,05 eq / DETA addition in NaOH solution                                            | 10          | 80               | 70        |
| CuCl <sub>2</sub> 0,05 eq / DETA addition in NaOH solution | 90                                                                                                    | 80          | 41               |           |
| <b>Temp. test</b>                                          | CuCl <sub>2</sub> 0,1 eq                                                                              | 15          | 60               | 64        |
|                                                            | CuCl <sub>2</sub> 0,1 eq                                                                              | 10          | 110              | 82,6      |
|                                                            | CuCl <sub>2</sub> 0,1 eq                                                                              | o.n.        | rt               | 79        |
| <b>Solvents</b>                                            | MeOH                                                                                                  | 15          | 80               | -         |
|                                                            | 2-PrOH                                                                                                | 15          | 80               | -         |
|                                                            | H <sub>2</sub> O                                                                                      | 15          | 80               | -         |

**Figure S1:** ESI/MS spectrum of the crude mixture for the synthesis of **4b** after 15 minutes of stirring at 80 °C. The major peaks relate to the target product ( $[M+H]^+$   $m/z = 182,2$ ) and the fragment with mass  $[M+H]^+$   $m/z = 165,0$  originated from  $\alpha$ -cleavage of **4b** [1].

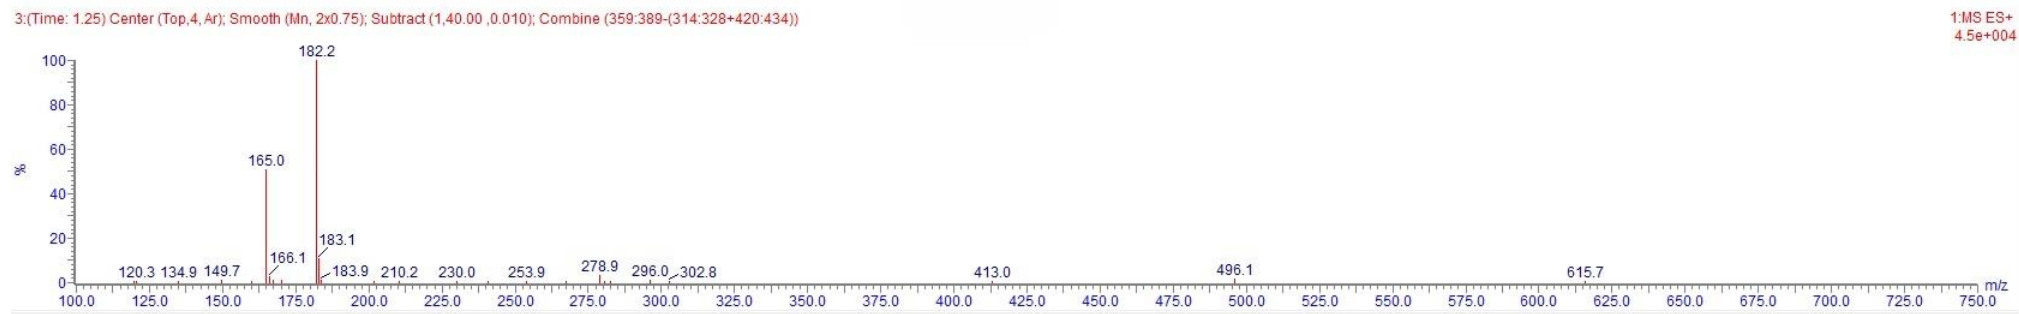

**Figure S2:** ESI/MS spectrum of the crude mixture for the synthesis of **4b** after 30 minutes of stirring at 80 °C.

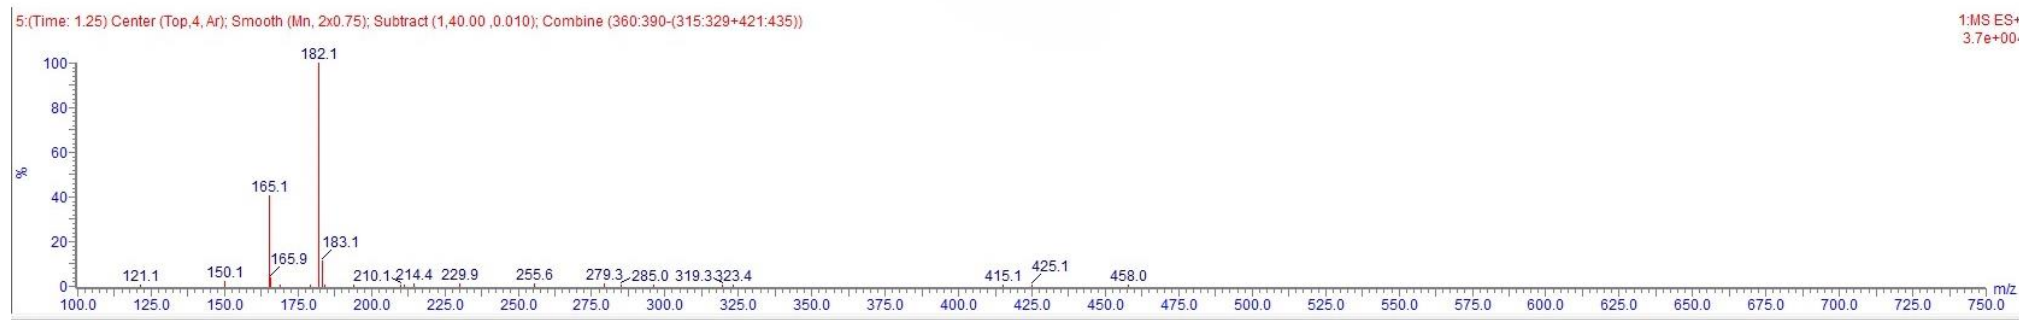

**Figure S3:** ESI/MS spectrum of the crude mixture for the synthesis of **4b** after 45 minutes of stirring at 80 °C. New structures with higher molecular masses emerge, while the concentration of **4b** decreases. The peaks with masses > 500 might indicate the formation of trimeric products.

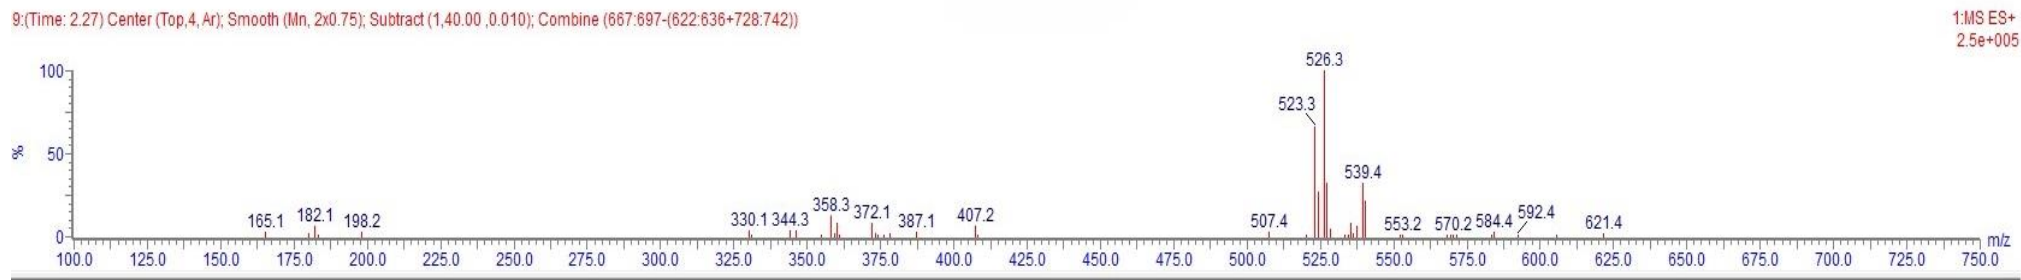

**Figure S4:** ESI/MS spectrum of the crude mixture for the synthesis of **4b** after 60 minutes of stirring at 80 °C. The peak with  $[M+H]^+$   $m/z = 151,0$  is associated to the fragment originated from  $\beta$ -cleavage of **4b** [1]. The peak with  $[M+H]^+$   $m/z = 362,2$  might be resulting from the formation of *N,N*-bis(2,5-dimethoxyphenethyl)hydroxylamine as an intermediate species.

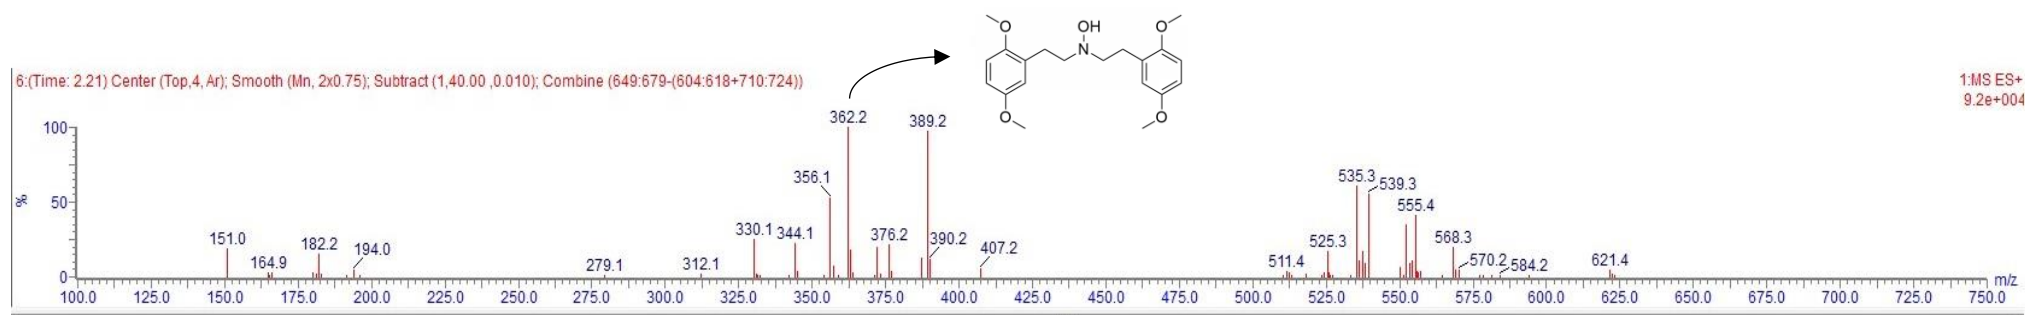

**Figure S5:** ESI/MS spectrum of the crude mixture for the synthesis of **4b** after 75 minutes of stirring at 80 °C.

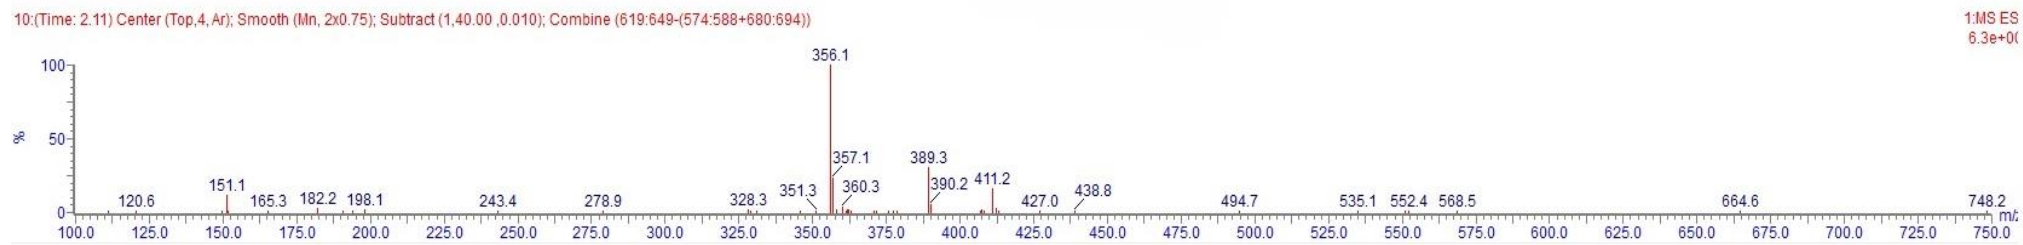

**Figure S6:** ESI/MS spectrum of the crude mixture for the synthesis of **4b** after 90 minutes of stirring at 80 °C.

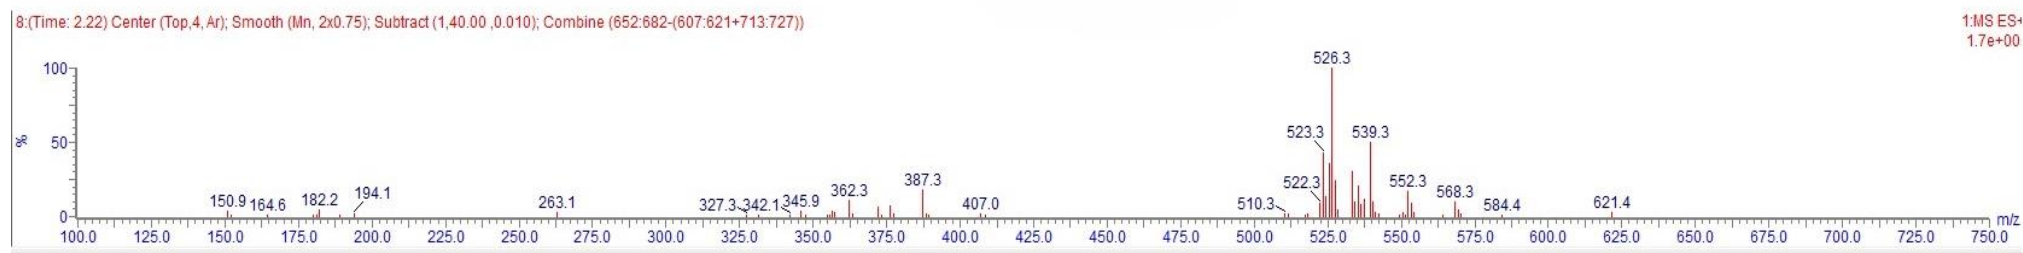



## References

[1] Chen, B.H.; Liu, J.T.; Chen, H.M.; Chen, W.X.; Lin, C.H. *Applied Sciences* **2018**, *8*(7), p.1022.
